# Supplementary material for: Replicated associations of FADS1, MAD1L1, and a rare variant at 10q26.13 with bipolar disorder in Chinese population
Source: Transl Psychiatry. 2018 Dec 7;8:270. doi: 10.1038/s41398-018-0337-x (PMC6286364; doi:10.1038/s41398-018-0337-x)

**Figure S1. Global distributions of rs174576 in 53 world populations**

**SNP: rs174576**

**Protective Allele: C**

**Risk Allele: A**

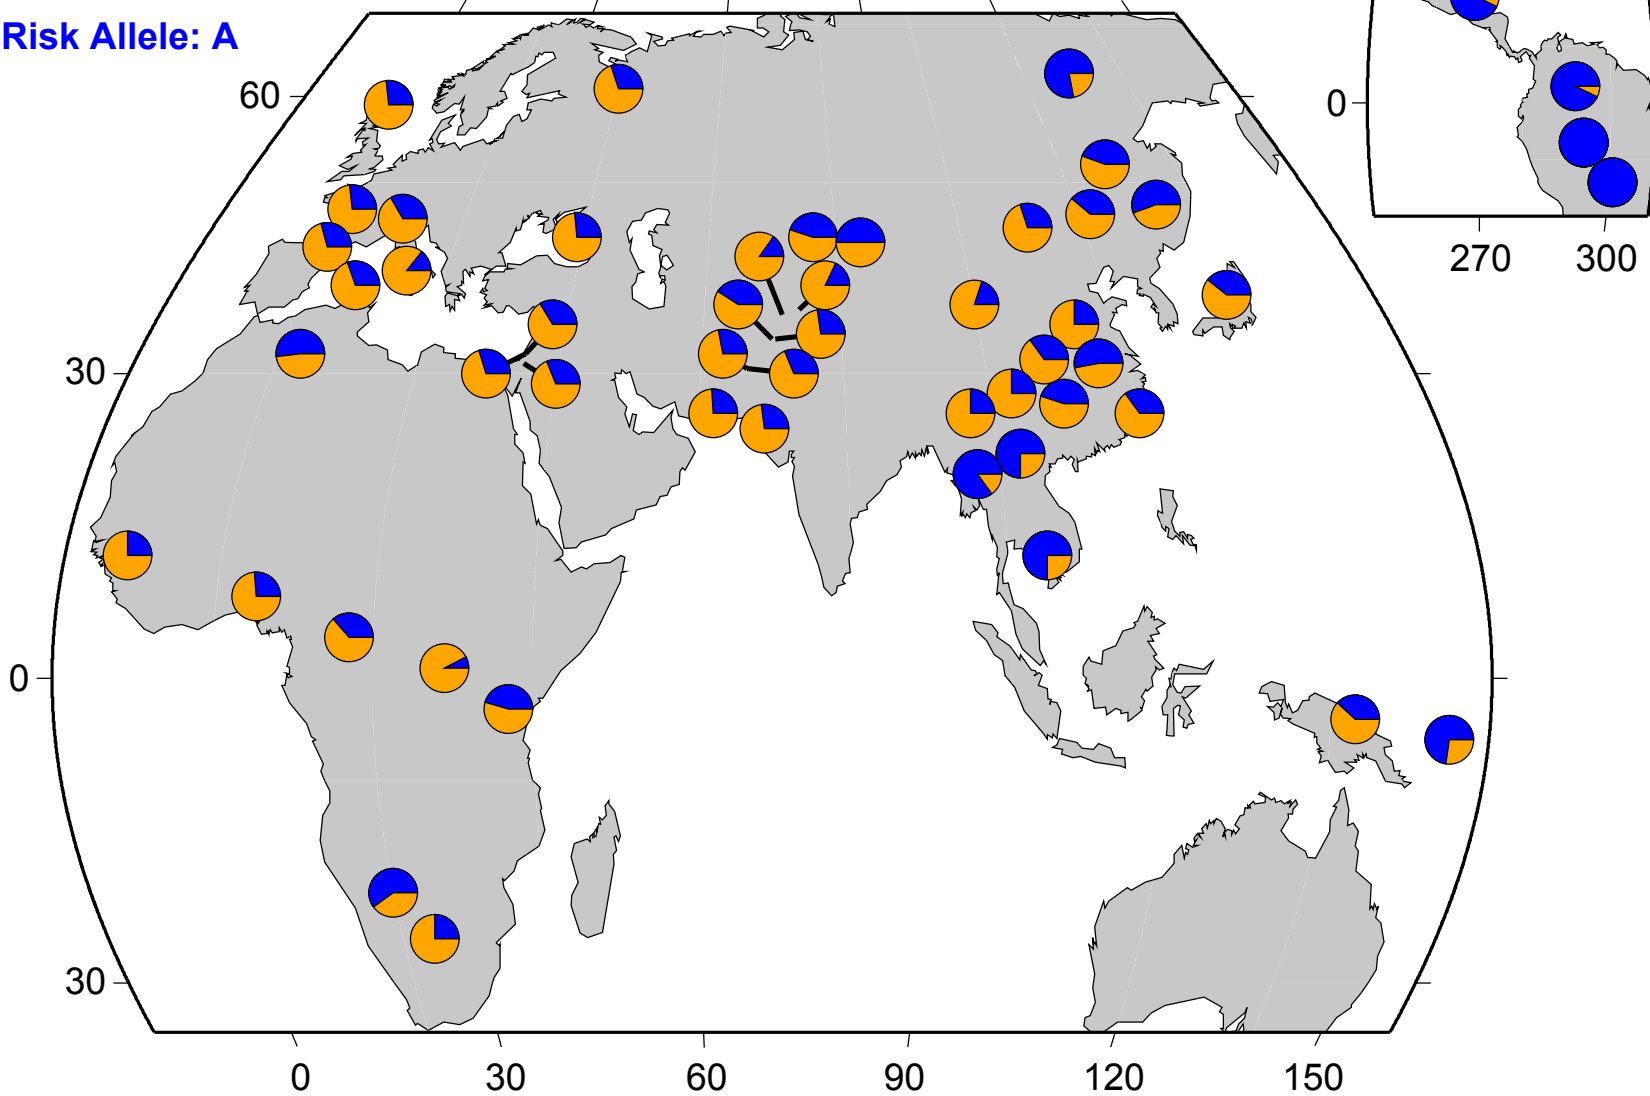

**Figure S2. Plot of chromosome region showing a genomic area of LD with rs174576 in Europeans and East Asians**

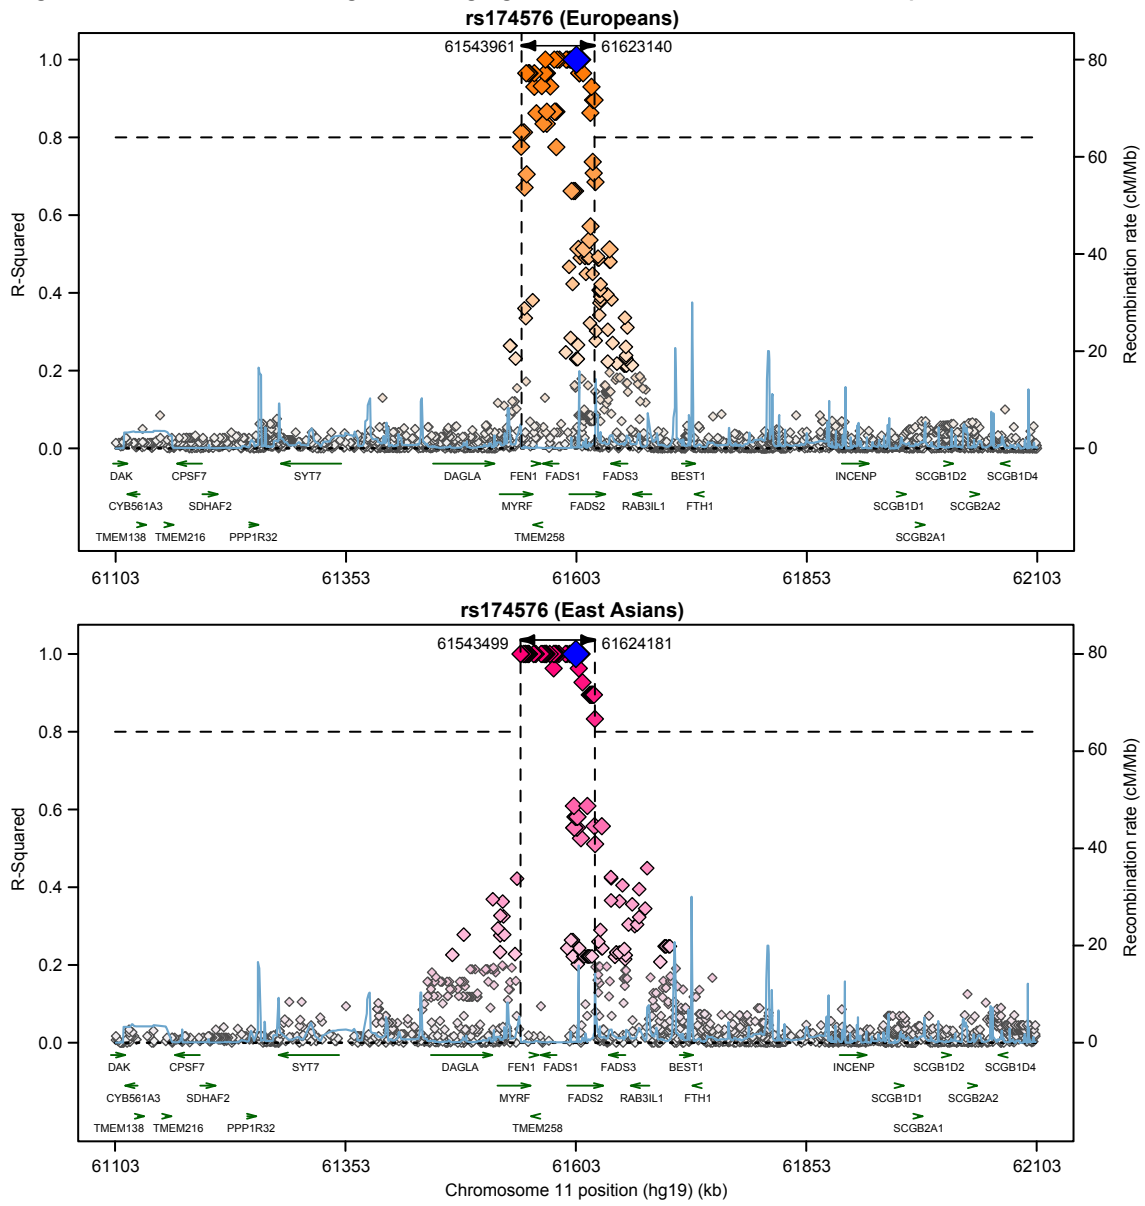

**Figure S3. Functional prediction of the SNPs in high LD ( $r^2 > 0.8$ ) with rs174576 using HaploReg**

Query SNP: **rs174576** and variants with  $r^2 \geq 0.8$

| chr | pos (hg38) | LD (r <sup>2</sup> ) | LD (D') | variant                   | Ref | Alt | AFR freq | AMR freq | ASN freq | EUR freq | SiPhy cons | Promoter histone marks | Enhancer histone marks | DNAse       | Proteins bound   | Motifs changed      | NHGRI/EBI GWAS hits | GRASP QTL hits | Selected eQTL hits | GENCODE genes | dbSNP func annot |
|-----|------------|----------------------|---------|---------------------------|-----|-----|----------|----------|----------|----------|------------|------------------------|------------------------|-------------|------------------|---------------------|---------------------|----------------|--------------------|---------------|------------------|
| 11  | 61781553   | 0.85                 | 0.94    | <a href="#">rs174533</a>  | G   | A   | 0.04     | 0.55     | 0.41     | 0.36     |            | SKIN                   | 7 tissues              | LNG         |                  | PU.1                |                     | 16 hits        | 42 hits            | C11orf9       | intronic         |
| 11  | 61783884   | 0.85                 | 0.93    | <a href="#">rs174535</a>  | T   | C   | 0.14     | 0.56     | 0.41     | 0.36     |            |                        | 7 tissues              | ESC,KID,BRN | CTCF             | Mrg                 | 6 hits              | 115 hits       | 45 hits            | C11orf9       | synonymous       |
| 11  | 61784455   | 0.86                 | 0.94    | <a href="#">rs174536</a>  | A   | C   | 0.04     | 0.55     | 0.41     | 0.36     |            |                        | 8 tissues              | LIV         |                  | HEN1,ZBTB7A         | 2 hits              | 114 hits       | 44 hits            | C11orf9       | intronic         |
| 11  | 61785208   | 0.86                 | 0.94    | <a href="#">rs174537</a>  | G   | T   | 0.04     | 0.55     | 0.41     | 0.36     |            |                        | ESDR, IPSC, SKIN       |             |                  | HNF4                | 2 hits              | 705 hits       | 44 hits            | C11orf9       | intronic         |
| 11  | 61790331   | 0.88                 | 0.95    | <a href="#">rs102275</a>  | T   | C   | 0.63     | 0.63     | 0.41     | 0.37     |            |                        |                        |             |                  |                     | 11 hits             | 156 hits       | 41 hits            | C11orf10      | intronic         |
| 11  | 61790354   | 0.86                 | 0.95    | <a href="#">rs102274</a>  | T   | C   | 0.04     | 0.55     | 0.41     | 0.36     |            |                        |                        |             |                  | EWSR1-FLI1          |                     | 16 hits        | 41 hits            | C11orf10      | intronic         |
| 11  | 61801834   | 0.87                 | 0.95    | <a href="#">rs174545</a>  | C   | G   | 0.04     | 0.54     | 0.41     | 0.36     |            |                        | ESDR, LNG, BLD         | IPSC        |                  | 4 altered motifs    | 2 hits              | 110 hits       | 44 hits            | FADS1         | 3'-UTR           |
| 11  | 61802358   | 0.87                 | 0.95    | <a href="#">rs174546</a>  | C   | T   | 0.04     | 0.54     | 0.41     | 0.36     |            |                        | ESDR, LNG, BLD         | BLD         |                  | BDP1,RXRA           | 11 hits             | 159 hits       | 44 hits            | FADS1         | 3'-UTR           |
| 11  | 61803311   | 0.87                 | 0.95    | <a href="#">rs174547</a>  | T   | C   | 0.04     | 0.54     | 0.41     | 0.36     |            |                        | SKIN, BLD              |             |                  | AIRE,Egr-1          | 13 hits             | 399 hits       | 44 hits            | FADS1         | intronic         |
| 11  | 61804006   | 0.87                 | 0.95    | <a href="#">rs174550</a>  | T   | C   | 0.04     | 0.54     | 0.41     | 0.36     |            |                        | 4 tissues              |             | POL2,POL24H8     | ERalpha-a           | 10 hits             | 116 hits       | 44 hits            | FADS1         | intronic         |
| 11  | 61806212   | 0.8                  | 0.94    | <a href="#">rs174551</a>  | T   | C   | 0.04     | 0.48     | 0.38     | 0.34     |            |                        | BLD                    |             |                  | 8 altered motifs    |                     |                | 41 hits            | FADS1         | intronic         |
| 11  | 61807686   | 0.87                 | 0.95    | <a href="#">rs174553</a>  | A   | G,T | 0.04     | 0.54     | 0.41     | 0.36     |            |                        | BLD                    | MUS,BLD     |                  |                     |                     | 16 hits        | 41 hits            | FADS1         | intronic         |
| 11  | 61811991   | 0.87                 | 0.95    | <a href="#">rs174554</a>  | A   | G   | 0.04     | 0.54     | 0.41     | 0.36     |            |                        | GI, BLD                | 4 tissues   |                  | 4 altered motifs    |                     | 16 hits        | 41 hits            | FADS1         | intronic         |
| 11  | 61817672   | 0.87                 | 0.95    | <a href="#">rs174562</a>  | A   | G   | 0.04     | 0.54     | 0.41     | 0.36     |            | 19 tissues             | 14 tissues             | 11 tissues  |                  | Znf143              |                     | 16 hits        | 41 hits            | FADS1         |                  |
| 11  | 61820833   | 0.87                 | 0.95    | <a href="#">rs174564</a>  | A   | G   | 0.08     | 0.56     | 0.41     | 0.36     |            |                        | 12 tissues             |             |                  | 4 altered motifs    |                     |                | 40 hits            | FADS1         |                  |
| 11  | 61824890   | 0.91                 | 0.96    | <a href="#">rs174566</a>  | A   | G   | 0.20     | 0.57     | 0.41     | 0.36     |            | SKIN                   | BLD                    |             |                  |                     |                     | 16 hits        | 40 hits            | FADS1         |                  |
| 11  | 61825533   | 0.9                  | 0.96    | <a href="#">rs174567</a>  | A   | G   | 0.21     | 0.57     | 0.41     | 0.36     |            |                        |                        |             |                  | HNF4,RXRA,VDR       |                     |                | 38 hits            | FADS1         |                  |
| 11  | 61826344   | 0.88                 | 0.96    | <a href="#">rs174568</a>  | C   | T   | 0.04     | 0.54     | 0.41     | 0.35     |            |                        | 9 tissues              | MUS,LIV     |                  |                     |                     | 16 hits        | 43 hits            | FADS1         |                  |
| 11  | 61827448   | 0.88                 | 0.95    | <a href="#">rs3834458</a> | CT  | C   | 0.04     | 0.54     | 0.41     | 0.36     |            | 21 tissues             | 7 tissues              | 32 tissues  | 4 bound proteins | 4 altered motifs    |                     |                | 42 hits            | FADS1         |                  |
| 11  | 61828850   | 0.88                 | 0.96    | <a href="#">rs5792235</a> | CA  | C   | 0.10     | 0.55     | 0.41     | 0.36     |            | 22 tissues             | BLD, GI                | 25 tissues  | 5 bound proteins | 9 altered motifs    |                     |                | 41 hits            | FADS1         | intronic         |
| 11  | 61829161   | 0.91                 | 0.96    | <a href="#">rs99780</a>   | C   | T   | 0.35     | 0.57     | 0.41     | 0.37     |            | 22 tissues             | 4 tissues              | 34 tissues  | POL2             | 4 altered motifs    |                     | 16 hits        | 39 hits            | FADS1         | intronic         |
| 11  | 61830500   | 0.9                  | 0.96    | <a href="#">rs1535</a>    | A   | G   | 0.11     | 0.55     | 0.41     | 0.36     |            | 18 tissues             | 15 tissues             | 7 tissues   | ERALPHA_A        | AIRE,ERalpha-a,Nrf1 | 5 hits              | 152 hits       | 45 hits            | FADS2         | intronic         |
| 11  | 61832870   | 0.93                 | -0.97   | <a href="#">rs174574</a>  | A   | C   | 0.44     | 0.39     | 0.59     | 0.63     |            | BLD                    | 15 tissues             | 7 tissues   | POL2             | 4 altered motifs    | 2 hits              | 20 hits        | 43 hits            | FADS2         | intronic         |
| 11  | 61836038   | 1                    | 1       | <b>rs174576</b>           | C   | A   | 0.27     | 0.58     | 0.41     | 0.37     |            | BLD                    | 7 tissues              | IPSC,BLD    |                  | 4 altered motifs    | 1 hit               | 130 hits       | 40 hits            | FADS2         | intronic         |
| 11  | 61837342   | 0.98                 | 1       | <a href="#">rs174577</a>  | C   | A   | 0.34     | 0.59     | 0.41     | 0.37     |            |                        | 5 tissues              | 4 tissues   |                  | Zic                 | 3 hits              | 115 hits       | 41 hits            | FADS2         | intronic         |
| 11  | 61838027   | 0.98                 | 1       | <a href="#">rs174578</a>  | T   | A   | 0.34     | 0.59     | 0.41     | 0.37     |            | SPLN                   | IPSC, BLD              |             | STAT1,STAT2      | 4 altered motifs    | 3 hits              | 17 hits        | 41 hits            | FADS2         | intronic         |
| 11  | 61839170   | 0.98                 | 1       | <a href="#">rs174580</a>  | A   | G   | 0.34     | 0.59     | 0.41     | 0.37     |            |                        |                        | BLD         |                  | 4 altered motifs    |                     | 16 hits        | 37 hits            | FADS2         | intronic         |
| 11  | 61839211   | 0.98                 | 1       | <a href="#">rs174581</a>  | G   | A   | 0.34     | 0.59     | 0.41     | 0.37     |            |                        |                        | BLD         |                  | VDR                 |                     | 16 hits        | 37 hits            | FADS2         | intronic         |
| 11  | 61842278   | 0.94                 | 0.98    | <a href="#">rs174583</a>  | C   | T   | 0.28     | 0.59     | 0.42     | 0.37     |            | BLD                    | 4 tissues              | 4 tissues   | POL2             | Nkx2                | 3 hits              | 118 hits       | 39 hits            | FADS2         | intronic         |
| 11  | 61843278   | 0.9                  | 0.95    | <a href="#">rs174584</a>  | G   | A   | 0.37     | 0.59     | 0.42     | 0.37     |            |                        | BLD                    |             |                  | 7 altered motifs    |                     | 16 hits        | 36 hits            | FADS2         | intronic         |
| 11  | 61851136   | 0.85                 | 0.97    | <a href="#">rs174592</a>  | A   | G   | 0.58     | 0.61     | 0.42     | 0.39     |            | BRN                    | 8 tissues              | 6 tissues   |                  | 6 altered motifs    |                     | 16 hits        | 35 hits            | FADS2         | intronic         |
| 11  | 61852357   | 0.82                 | -0.96   | <a href="#">rs174594</a>  | C   | A   | 0.08     | 0.35     | 0.58     | 0.61     |            |                        | ADRL, HRT              | SKIN        |                  | Nanog               |                     | 16 hits        | 34 hits            | FADS2         | intronic         |
| 11  | 61854084   | 0.81                 | 0.94    | <a href="#">rs174599</a>  | G   | C   | 0.63     | 0.62     | 0.42     | 0.39     |            |                        | 11 tissues             | 5 tissues   |                  | RXRA                |                     | 16 hits        | 32 hits            | FADS2         | intronic         |
| 11  | 61855668   | 0.82                 | 0.96    | <a href="#">rs174601</a>  | C   | T   | 0.63     | 0.62     | 0.42     | 0.40     |            |                        | 6 tissues              |             |                  |                     | 4 hits              | 19 hits        | 37 hits            | FADS2         | intronic         |

**Figure S4. Locations of rs4236274 and rs4332037 in *MAD1L1*.** The figure was plotted via LocusZoom using statistical data from Hou et al. BPD GWAS.

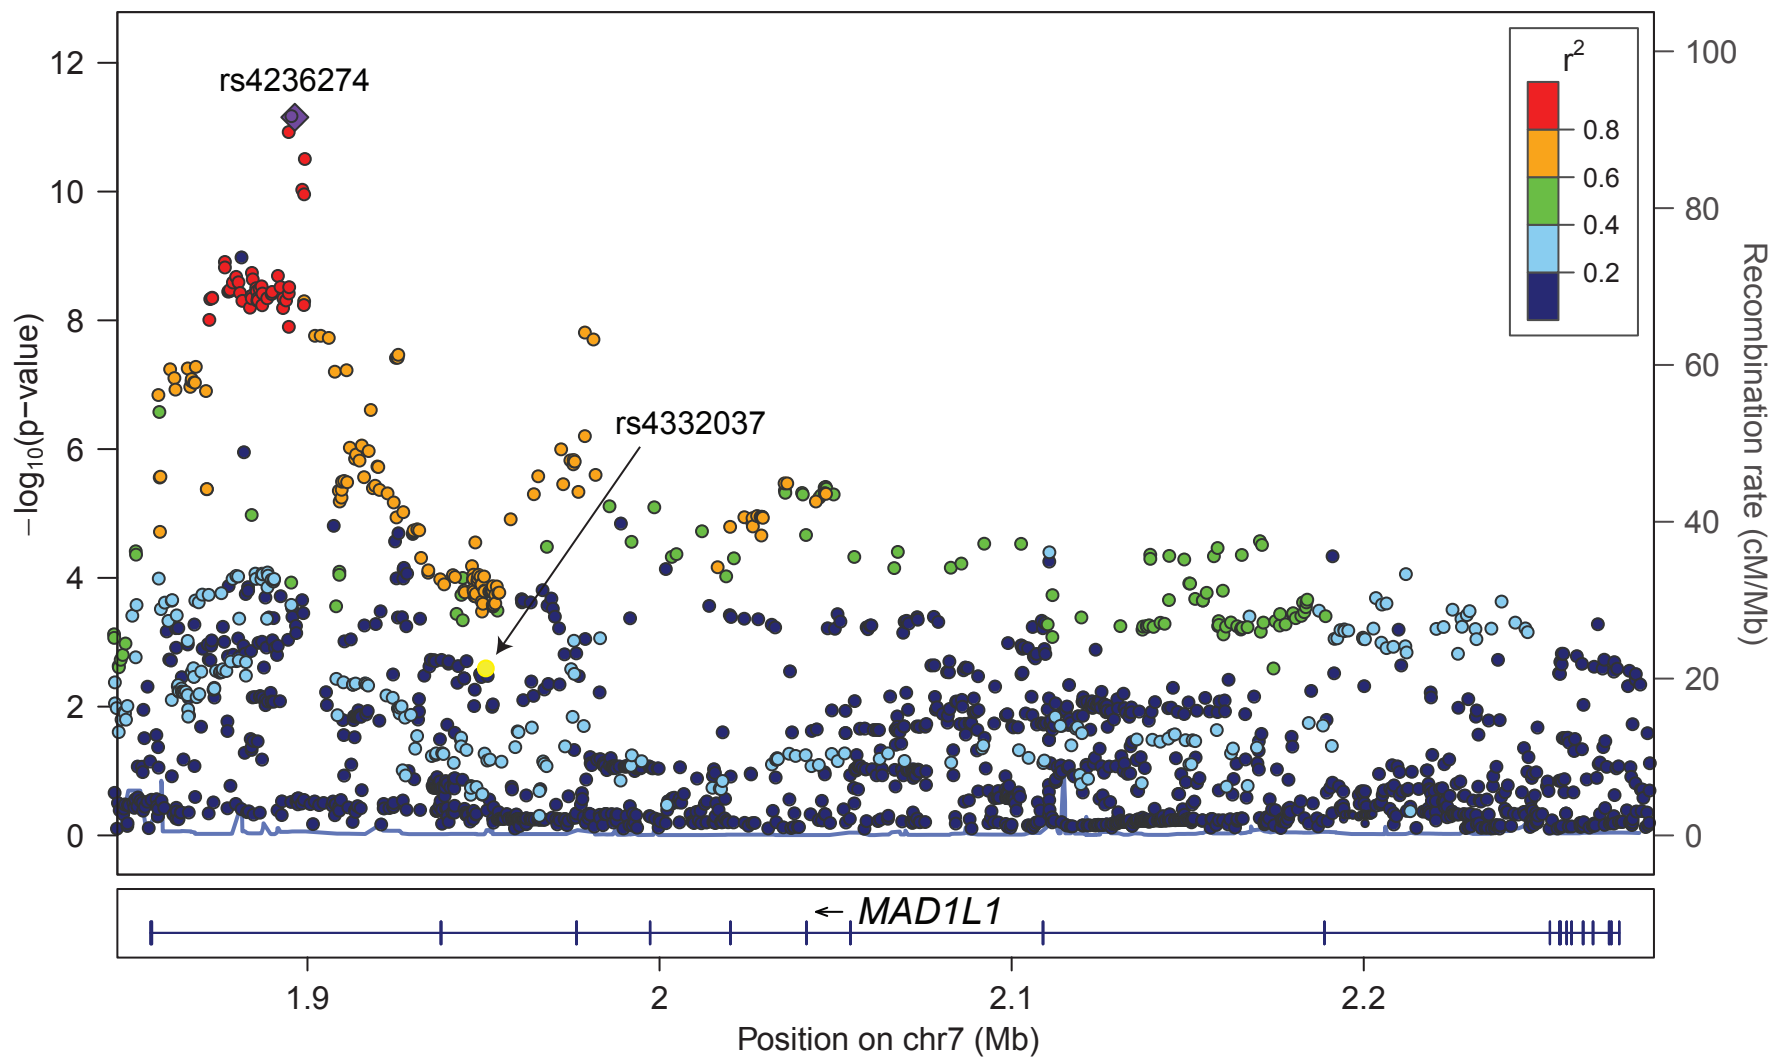

**Figure S5. Associations of genetic variations surrounding rs78089757 with BPD in European populations.** The figure was plotted *via* LocusZoom using statistical data from Hou et al. BPD GWAS.

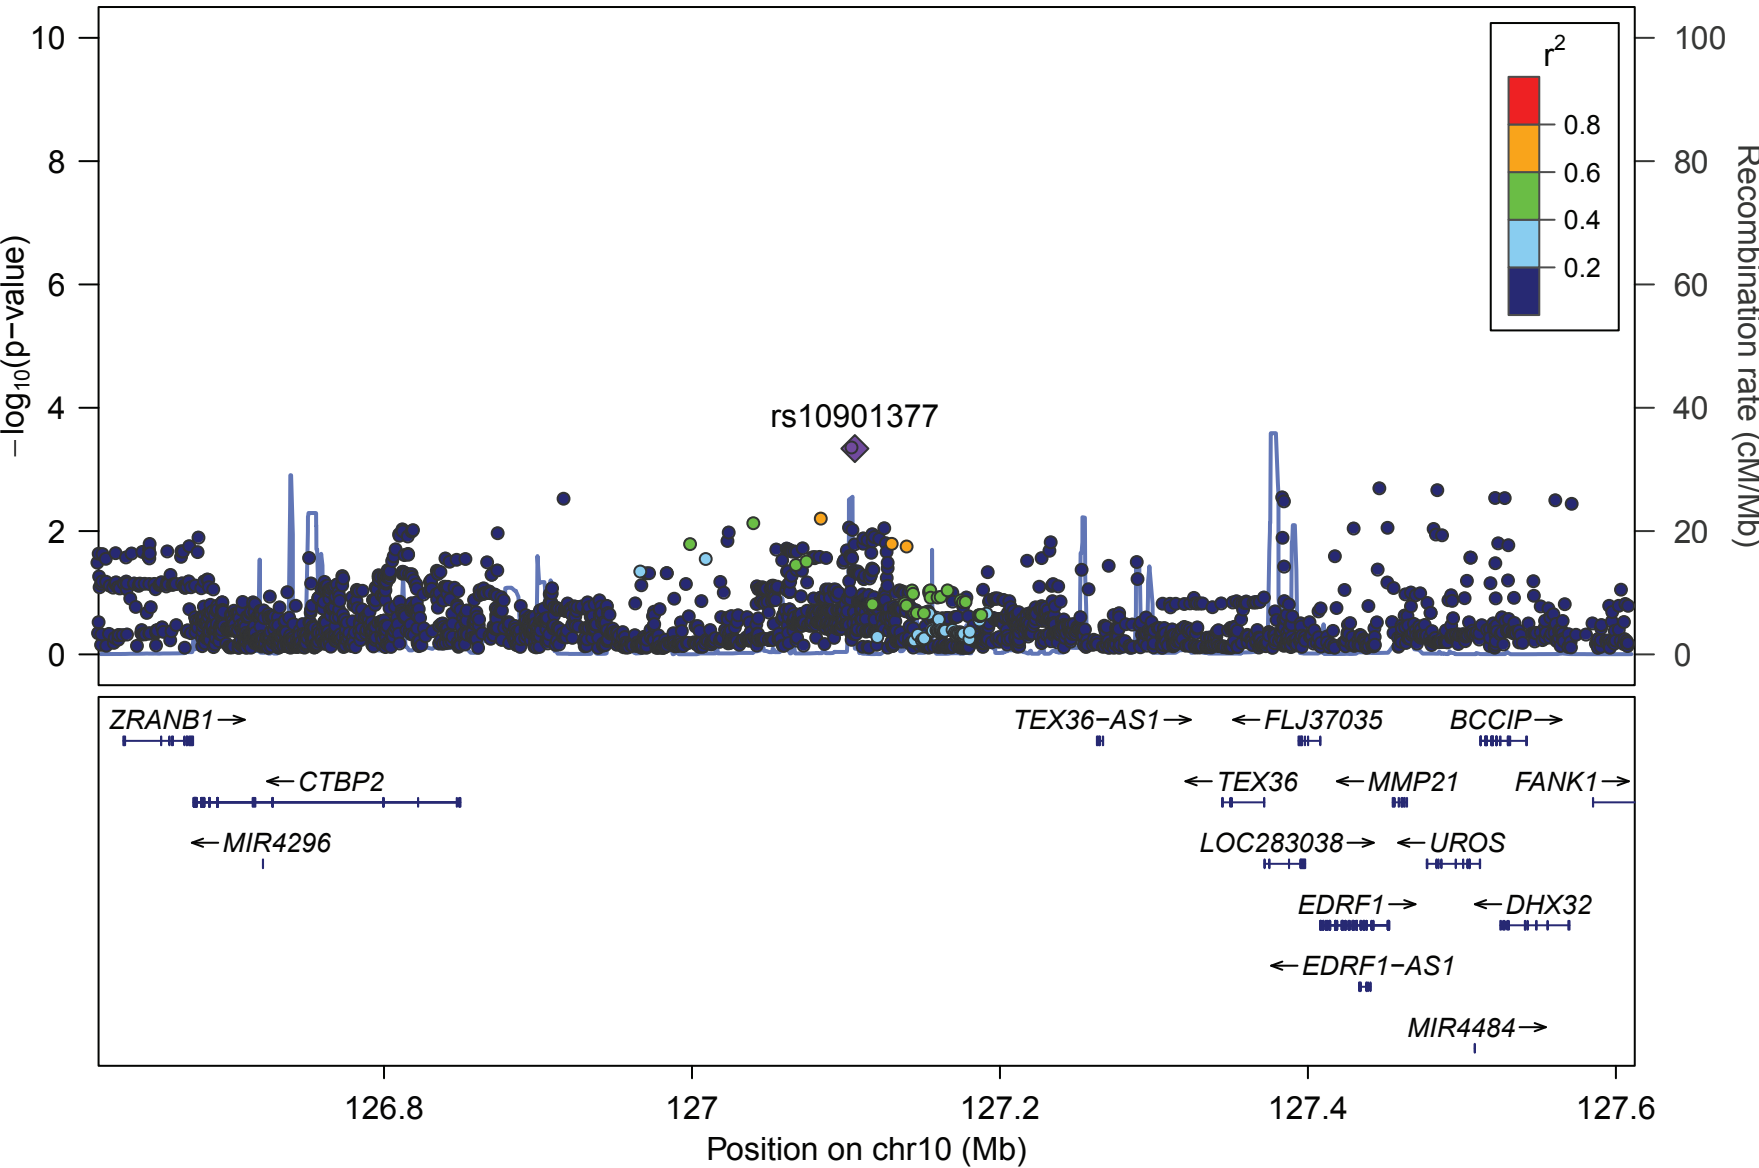

Supplement: Supplementary file 1 — Supplementary Figures [file 41398_2018_337_MOESM1_ESM.pdf]
