# Supplementary material for: Replicated associations of FADS1, MAD1L1, and a rare variant at 10q26.13 with bipolar disorder in Chinese population
Source: PubMed Central journal article supplement (PMC6286364; doi:10.1038/s41398-018-0337-x), 2018-12-07
Supplement: 41398_2018_337_MOESM2_ESM.pdf [file 41398_2018_337_MOESM2_ESM.pdf]

**Table S1. Meta-analysis of the 21 SNPs using our Han Chinese samples with previous GWAS.**

| CHR | SNP         | Allele | Our Han Chinese |       |         | Previous studies                                                   |         |       |       |          |      | Meta-analysis |       |       |                |
|-----|-------------|--------|-----------------|-------|---------|--------------------------------------------------------------------|---------|-------|-------|----------|------|---------------|-------|-------|----------------|
|     |             |        | OR              | SE    | P-value | Case                                                               | Control | OR    | SE    | P-value  | Ref. | P-value       | OR    | Q     | I <sup>2</sup> |
| 2   | rs17183814  | G/A    | 1.153           | 0.077 | 0.0623  | 29,764                                                             | 169,118 | 1.142 | 0.022 | 2.02E-09 | 14   | 3.47E-10      | 1.143 | 0.902 | 0              |
| 3   | rs2302417   | T/A    | 1.083           | 0.054 | 0.144   | 29,764                                                             | 169,118 | 1.076 | 0.011 | 6.59E-11 | 14   | 1.89E-11      | 1.076 | 0.909 | 0              |
| 3   | rs3804640   | A/G    | 1.147           | 0.077 | 0.0738  | 29,764                                                             | 169,118 | 1.065 | 0.011 | 1.99E-08 | 14   | 6.42E-09      | 1.067 | 0.339 | 0              |
| 4   | rs11724116  | C/T    | 1.045           | 0.077 | 0.571   | 29,764                                                             | 169,118 | 1.089 | 0.015 | 2.37E-08 | 14   | 2.18E-08      | 1.087 | 0.602 | 0              |
| 6   | rs10455979  | G/C    | 0.944           | 0.060 | 0.336   | 29,764                                                             | 169,118 | 1.064 | 0.011 | 4.31E-08 | 14   | 0.777         | 1.017 | 0.048 | 74.40          |
| 7   | rs4236274   | A/G    | 1.140           | 0.054 | 0.0146  | 9,784                                                              | 30,471  | 1.149 | 0.020 | 8.49E-12 | 15   | 4.09E-13      | 1.148 | 0.886 | 0              |
| 7   | rs4332037   | T/C    | 1.218           | 0.086 | 0.0209  | 10,445                                                             | 71,137  | 1.170 | 0.026 | 1.91E-09 | 17   | 1.38E-10      | 1.174 | 0.653 | 0              |
| 9   | rs12553324  | G/C    | 0.946           | 0.053 | 0.297   | 9,784                                                              | 30,471  | 1.120 | 0.019 | 5.87E-09 | 15   | 0.668         | 1.037 | 0.003 | 88.79          |
| 10  | rs10821745  | G/T    | 1.013           | 0.063 | 0.835   | 29,764                                                             | 169,118 | 1.145 | 0.023 | 6.76E-09 | 14   | 0.140         | 1.092 | 0.067 | 70.20          |
| 10  | rs78089757  | A/G    | 1.358           | 0.180 | 0.0881  | The result of meta-analysis of this SNP is shown in <b>Table 3</b> |         |       |       |          |      |               |       |       |                |
| 11  | rs174576    | A/C    | 1.110           | 0.052 | 0.0459  | The result of meta-analysis of this SNP is shown in <b>Table 2</b> |         |       |       |          |      |               |       |       |                |
| 11  | rs7122539   | G/A    | 1.086           | 0.052 | 0.113   | 29,764                                                             | 169,118 | 1.067 | 0.012 | 3.77E-08 | 14   | 1.29E-08      | 1.068 | 0.739 | 0              |
| 11  | rs12575685  | A/G    | 1.066           | 0.060 | 0.285   | 29,764                                                             | 169,118 | 1.073 | 0.012 | 7.71E-09 | 14   | 4.85E-09      | 1.072 | 0.918 | 0              |
| 11  | rs12290811  | A/T    | 1.093           | 0.112 | 0.428   | 9,747                                                              | 14,278  | 1.190 | 0.027 | 7.81E-11 | 18   | 7.48E-11      | 1.185 | 0.460 | 0              |
| 11  | rs329674    | A/G    | 0.973           | 0.066 | 0.678   | 2,964                                                              | 61,887  | 1.220 | 0.037 | 9.59E-08 | 17   | 0.414         | 1.097 | 0.003 | 88.79          |
| 12  | rs10744560  | T/C    | 1.130           | 0.115 | 0.287   | 29,764                                                             | 169,118 | 1.076 | 0.012 | 3.62E-10 | 14   | 2.41E-10      | 1.077 | 0.671 | 0              |
| 15  | rs4447398   | A/C    | 0.977           | 0.060 | 0.701   | 29,764                                                             | 169,118 | 1.099 | 0.016 | 9.37E-09 | 14   | 0.386         | 1.051 | 0.058 | 72.29          |
| 16  | rs11647445  | G/T    | 1.003           | 0.099 | 0.978   | 29,764                                                             | 169,118 | 1.079 | 0.012 | 1.08E-10 | 14   | 1.36E-10      | 1.077 | 0.466 | 0              |
| 17  | rs76317718  | G/T    | 0.989           | 0.058 | 0.848   | 2,964                                                              | 61,887  | 1.190 | 0.034 | 2.24E-07 | 17   | 0.342         | 1.092 | 0.006 | 86.72          |
| 17  | rs112114764 | G/T    | 1.080           | 0.066 | 0.244   | 29,764                                                             | 169,118 | 1.070 | 0.012 | 2.45E-08 | 14   | 1.30E-08      | 1.071 | 0.893 | 0              |
| 20  | rs6130764   | T/C    | 1.027           | 0.077 | 0.732   | 29,764                                                             | 169,118 | 1.064 | 0.011 | 3.25E-08 | 14   | 3.51E-08      | 1.064 | 0.646 | 0              |

**Note:**

The OR is based on the first allele shown in the third column.

The sample size of each SNP in the original publications were also shown.

OR, odds ratio; SE, standard error; Ref., reference.

**Table S2. Genotypic distributions of the 21 SNPs in our Han Chinese samples (1,146 BPD cases and 1,956 controls).**

| CHR | SNP         | Position  | Nearest Gene | A1 | A2 | TEST | Case        | Control      | 2-tailed P-value |
|-----|-------------|-----------|--------------|----|----|------|-------------|--------------|------------------|
| 2   | rs17183814  | 166152389 | SCN2A        | A  | G  | GENO | 22/241/863  | 52/459/1445  | 0.174            |
| 3   | rs2302417   | 52814256  | ITIH3        | A  | T  | GENO | 173/515/414 | 322/934/669  | 0.292            |
| 3   | rs3804640   | 107793709 | CD47         | G  | A  | GENO | 26/236/804  | 45/505/1404  | 0.0759           |
| 4   | rs11724116  | 162294038 | FSTL5        | T  | C  | GENO | 18/273/837  | 36/484/1436  | 0.841            |
| 6   | rs10455979  | 166995260 | RPS6KA2      | C  | G  | GENO | 98/452/541  | 144/787/953  | 0.429            |
| 7   | rs4236274   | 1896413   | MAD1L1       | A  | G  | GENO | 260/545/309 | 369/934/574  | 0.0393           |
| 7   | rs4332037   | 1950809   | MAD1L1       | T  | C  | GENO | 19/224/892  | 12/355/1589  | 0.00918          |
| 9   | rs12553324  | 23347865  | ELAVL2       | C  | G  | GENO | 286/553/282 | 460/988/507  | 0.469            |
| 10  | rs10821745  | 62136206  | ANK3         | G  | T  | GENO | 63/394/634  | 111/701/1144 | 0.978            |
| 10  | rs78089757  | 127112829 | intergenic   | A  | G  | GENO | 0/58/1078   | 0/74/1868    | 0.0969           |
| 11  | rs174576    | 61603510  | FADS1/2      | A  | C  | GENO | 249/523/345 | 376/931/649  | 0.104            |
| 11  | rs7122539   | 66662731  | RCE1         | A  | G  | GENO | 282/526/320 | 496/981/479  | 0.0504           |
| 11  | rs12575685  | 70517927  | SHANK2       | A  | G  | GENO | 92/439/591  | 131/775/1050 | 0.302            |
| 11  | rs12290811  | 79083620  | ODZ4         | A  | T  | GENO | 3/133/990   | 7/208/1739   | 0.572            |
| 11  | rs329674    | 133776948 | LOC646543    | A  | G  | GENO | 48/341/742  | 82/609/1265  | 0.851            |
| 12  | rs10744560  | 2387099   | CACNA1C      | T  | C  | GENO | 3/129/999   | 4/200/1748   | 0.606            |
| 15  | rs4447398   | 42904904  | HAUS2        | A  | C  | GENO | 76/459/597  | 149/771/1028 | 0.603            |
| 16  | rs11647445  | 9926966   | GRIN2A       | G  | T  | GENO | 10/152/972  | 12/271/1667  | 0.625            |
| 17  | rs76317718  | 8222777   | ARHGEF15     | T  | G  | GENO | 96/432/598  | 153/769/1034 | 0.735            |
| 17  | rs112114764 | 42201041  | HDAC5        | T  | G  | GENO | 48/352/732  | 82/648/1200  | 0.361            |
| 20  | rs6130764   | 43750410  | STK4         | C  | T  | GENO | 17/284/823  | 34/493/1413  | 0.887            |

| <b>Table S3. Functional prediction of the SNPs in high LD with rs174576 using GWAVA dataset</b> |                 |                 |                 |                 |                 |                 |                 |
|-------------------------------------------------------------------------------------------------|-----------------|-----------------|-----------------|-----------------|-----------------|-----------------|-----------------|
| <b>SNP</b>                                                                                      | <b>rs174528</b> | <b>rs174529</b> | <b>rs174530</b> | <b>rs108499</b> | <b>rs509360</b> | <b>rs174533</b> | <b>rs174534</b> |
| Chromosome                                                                                      | 11              | 11              | 11              | 11              | 11              | 11              | 11              |
| Position                                                                                        | 61,543,499      | 61,543,961      | 61,546,592      | 61,547,237      | 61,548,559      | 61,549,025      | 61,549,458      |
| Region score                                                                                    | 0.22            | 0.3             | 0.37            | 0.42            | 0.34            | 0.26            | 0.33            |
| TSS score                                                                                       | 0.26            | 0.2             | 0.19            | 0.24            | 0.16            | 0.13            | 0.09            |
| Unmatched score                                                                                 | 0.51            | 0.59            | 0.61            | 0.41            | 0.48            | 0.48            | 0.43            |
| Average GERP                                                                                    | 0.17893         | -1.23477        | -1.94495        | -0.67709        | -0.04432        | 0.83033         | -0.66566        |
| Average DAF                                                                                     | 0.00118         | 0.00118         | 0.00044         | 0.00042         | 0.00099         | 0.00134         | 0.00069         |
| Average het                                                                                     | 0.00097         | 0.00096         | 0.00063         | 0.00061         | 0.00122         | 0.0017          | 0.00094         |
| GERP                                                                                            | 2.14            | 1.34            | -3.64           | 3.32            | -2.42           | 0.295           | -6.02           |
| %GC                                                                                             | 68.3%           | 64.4%           | 69.3%           | 65.3%           | 59.4%           | 60.4%           | 45.5%           |
| TSS distance                                                                                    | -1578           | -1116           | 290             | -446            | -849            | -383            | 48              |
| SS distance                                                                                     | -26             | 54              | 34              | -74             | 39              | -17             | 159             |
| ACCEPTOR                                                                                        | -               | -               | -               | -               | -               | -               | -               |
| ATF3                                                                                            | -               | -               | -               | -               | -               | -               | -               |
| BATF                                                                                            | -               | -               | -               | -               | -               | -               | -               |
| BCL11A                                                                                          | -               | -               | -               | -               | -               | -               | -               |
| BCL3                                                                                            | -               | -               | -               | -               | -               | -               | -               |
| BCLAF1                                                                                          | -               | -               | -               | -               | -               | -               | -               |
| BDP1                                                                                            | -               | -               | -               | -               | -               | -               | -               |
| BHLHE40                                                                                         | -               | -               | -               | -               | -               | -               | -               |
| BRCA1                                                                                           | -               | -               | -               | -               | -               | -               | -               |
| BRF1                                                                                            | -               | -               | -               | -               | -               | -               | -               |
| BRF2                                                                                            | -               | -               | -               | -               | -               | -               | -               |
| CCNT2                                                                                           | -               | -               | -               | -               | -               | -               | -               |
| CDS                                                                                             | -               | -               | -               | -               | -               | -               | -               |
| CEBPB                                                                                           | -               | -               | -               | -               | -               | -               | -               |
| CHD2                                                                                            | -               | -               | -               | -               | -               | -               | -               |
| CTBP2                                                                                           | -               | -               | -               | -               | -               | -               | -               |
| CTCF                                                                                            | -               | 1               | -               | -               | -               | -               | -               |
| CTCF_L                                                                                          | -               | -               | -               | -               | -               | -               | -               |
| CTCF_REG                                                                                        | -               | 5               | -               | -               | -               | -               | -               |
| DNase                                                                                           | 5               | 2               | 2               | -               | 5               | 2               | 1               |
| DONOR                                                                                           | -               | -               | -               | -               | -               | -               | -               |
| E2F1                                                                                            | -               | -               | -               | -               | -               | -               | -               |
| E2F4                                                                                            | -               | -               | -               | -               | -               | -               | -               |
| E2F6                                                                                            | -               | -               | -               | -               | -               | -               | -               |
| EBF1                                                                                            | -               | -               | -               | -               | -               | -               | -               |
| EGR1                                                                                            | -               | -               | -               | -               | -               | -               | -               |
| ELF1                                                                                            | -               | -               | -               | -               | -               | -               | -               |
| ELK4                                                                                            | -               | -               | -               | -               | -               | -               | -               |
| ENH                                                                                             | -               | -               | -               | -               | -               | -               | -               |
| EP300                                                                                           | -               | -               | -               | -               | -               | -               | -               |
| ERALPHAA                                                                                        | -               | -               | -               | -               | -               | -               | -               |
| ESRRA                                                                                           | -               | -               | -               | -               | -               | -               | -               |
| ETS1                                                                                            | -               | -               | -               | -               | -               | -               | -               |
| EXON                                                                                            | -               | -               | 1               | -               | -               | -               | 1               |
| Eralphaa                                                                                        | -               | -               | -               | -               | -               | -               | -               |
| FAIRE                                                                                           | 2               | -               | -               | -               | 1               | -               | -               |
| FAM48A                                                                                          | -               | -               | -               | -               | -               | -               | -               |
| FOS                                                                                             | -               | -               | -               | -               | -               | -               | -               |
| FOSL1                                                                                           | -               | -               | -               | -               | -               | -               | -               |
| FOSL2                                                                                           | -               | -               | -               | -               | -               | -               | -               |
| FOXA1                                                                                           | -               | -               | -               | -               | -               | -               | -               |
| FOXA2                                                                                           | -               | -               | -               | -               | -               | -               | -               |
| GABPA                                                                                           | -               | -               | -               | -               | -               | -               | -               |
| GATA1                                                                                           | -               | -               | -               | -               | -               | -               | -               |
| GATA2                                                                                           | -               | -               | -               | -               | -               | -               | -               |

| SNP               | rs174528 | rs174529 | rs174530 | rs108499 | rs509360 | rs174533 | rs174534 |
|-------------------|----------|----------|----------|----------|----------|----------|----------|
| GATA3             | -        | -        | -        | -        | -        | -        | -        |
| GTF2B             | -        | -        | -        | -        | -        | -        | -        |
| GTF2F1            | -        | -        | -        | -        | -        | -        | -        |
| GTF3C2            | -        | -        | -        | -        | -        | -        | -        |
| H2AFZ             | -        | -        | -        | -        | -        | -        | -        |
| H3K27ac           | -        | -        | -        | -        | -        | -        | -        |
| H3K27me3          | 1        | 1        | 1        | -        | -        | -        | -        |
| H3K36me3          | 2        | 2        | 3        | 4        | 5        | 6        | 6        |
| H3K4me1           | 3        | 3        | 1        | -        | 2        | 2        | 2        |
| H3K4me2           | -        | -        | -        | -        | 1        | 1        | -        |
| H3K4me3           | -        | -        | -        | -        | -        | -        | -        |
| H3K79me2          | -        | -        | -        | -        | -        | -        | -        |
| H3K9ac            | 2        | 2        | 1        | 1        | 1        | 1        | 1        |
| H3K9me1           | -        | -        | -        | -        | -        | -        | -        |
| H3K9me3           | -        | -        | -        | -        | -        | -        | -        |
| H4K20me1          | -        | -        | -        | -        | -        | -        | -        |
| HDAC2             | -        | -        | -        | -        | -        | -        | -        |
| HDAC8             | -        | -        | -        | -        | -        | -        | -        |
| HEY1              | -        | -        | -        | -        | -        | -        | -        |
| HMGN3             | -        | -        | -        | -        | -        | -        | -        |
| HNF4A             | -        | -        | -        | -        | -        | -        | -        |
| HNF4G             | -        | -        | -        | -        | -        | -        | -        |
| HSF1              | -        | -        | -        | -        | -        | -        | -        |
| INTRON            | 1        | 1        | 1        | 1        | 1        | 1        | 1        |
| IRF1              | -        | -        | -        | -        | -        | -        | -        |
| IRF3              | -        | -        | -        | -        | -        | -        | -        |
| IRF4              | -        | -        | -        | -        | -        | -        | -        |
| JUN               | -        | -        | -        | -        | -        | -        | -        |
| JUNB              | -        | -        | -        | -        | -        | -        | -        |
| JUND              | -        | -        | -        | -        | -        | -        | -        |
| KAT2A             | -        | -        | -        | -        | -        | -        | -        |
| MAFF              | -        | -        | -        | -        | -        | -        | -        |
| MAFK              | -        | -        | -        | -        | -        | -        | -        |
| MAX               | -        | -        | -        | -        | -        | -        | -        |
| MEF2A             | -        | -        | -        | -        | -        | -        | -        |
| MEF2_complex      | -        | -        | -        | -        | -        | -        | -        |
| MXI1              | -        | -        | -        | -        | -        | -        | -        |
| MYC               | -        | -        | -        | -        | -        | -        | -        |
| NANOG             | -        | -        | -        | -        | -        | -        | -        |
| NFE2              | -        | -        | -        | -        | -        | -        | -        |
| NFKB1             | -        | -        | -        | -        | -        | -        | -        |
| NFYA              | -        | -        | -        | -        | -        | -        | -        |
| NFYB              | -        | -        | -        | -        | -        | -        | -        |
| NR2C2             | -        | -        | -        | -        | -        | -        | -        |
| NR3C1             | -        | -        | -        | -        | -        | -        | -        |
| NR4A1             | -        | -        | -        | -        | -        | -        | -        |
| NRF1              | -        | -        | -        | -        | -        | -        | -        |
| PAX5              | -        | -        | -        | -        | -        | -        | -        |
| PBX3              | -        | -        | -        | -        | -        | -        | -        |
| POLR2A            | -        | -        | -        | -        | 1        | -        | -        |
| POLR2A_elongating | -        | -        | -        | -        | -        | -        | -        |
| POLR3A            | -        | -        | -        | -        | -        | -        | -        |
| POU2F2            | -        | -        | -        | -        | -        | -        | -        |
| POU5F1            | -        | -        | -        | -        | -        | -        | -        |
| PPARGC1A          | -        | -        | -        | -        | -        | -        | -        |
| PRDM1             | -        | -        | -        | -        | -        | -        | -        |
| RAD21             | -        | -        | -        | -        | -        | -        | -        |
| RDBP              | -        | -        | -        | -        | -        | -        | -        |

| SNP          | rs174528 | rs174529 | rs174530 | rs108499 | rs509360 | rs174533 | rs174534 |
|--------------|----------|----------|----------|----------|----------|----------|----------|
| REP          | -        | -        | -        | -        | -        | 1        | -        |
| REST         | -        | -        | -        | -        | -        | -        | -        |
| RFX5         | -        | -        | -        | -        | -        | -        | -        |
| RXRA         | -        | -        | -        | -        | -        | -        | -        |
| SETDB1       | -        | -        | -        | -        | -        | -        | -        |
| SIN3A        | -        | -        | -        | -        | -        | -        | -        |
| SIRT6        | -        | -        | -        | -        | -        | -        | -        |
| SIX5         | -        | -        | -        | -        | -        | -        | -        |
| SLC22A2      | -        | -        | -        | -        | -        | -        | -        |
| SMARCA4      | -        | -        | -        | -        | -        | -        | -        |
| SMARCB1      | -        | -        | -        | -        | -        | -        | -        |
| SMARCC1      | -        | -        | -        | -        | -        | -        | -        |
| SMARCC2      | -        | -        | -        | -        | -        | -        | -        |
| SMC3         | -        | -        | -        | -        | -        | -        | -        |
| SP1          | -        | -        | -        | -        | -        | -        | -        |
| SP2          | -        | -        | -        | -        | -        | -        | -        |
| SPI1         | -        | -        | -        | -        | -        | -        | -        |
| SREBF1       | -        | -        | -        | -        | -        | -        | -        |
| SREBF2       | -        | -        | -        | -        | -        | -        | -        |
| SRF          | -        | -        | -        | -        | -        | -        | -        |
| START        | -        | -        | -        | -        | -        | -        | -        |
| STAT1        | -        | -        | -        | -        | -        | -        | -        |
| STAT2        | -        | -        | -        | -        | -        | -        | -        |
| STAT3        | -        | -        | -        | -        | -        | -        | -        |
| STOP         | -        | -        | -        | -        | -        | -        | -        |
| SUZ12        | -        | -        | -        | -        | -        | -        | -        |
| TAF1         | -        | -        | -        | -        | -        | -        | -        |
| TAF7         | -        | -        | -        | -        | -        | -        | -        |
| TAL1         | -        | -        | -        | -        | -        | -        | -        |
| TBP          | -        | -        | -        | -        | -        | -        | -        |
| TCF12        | -        | -        | -        | -        | -        | -        | -        |
| TCF7L2       | -        | -        | -        | -        | -        | -        | -        |
| TFAP2A       | -        | -        | -        | -        | -        | -        | -        |
| TFAP2C       | -        | -        | -        | -        | -        | -        | -        |
| THAP1        | -        | -        | -        | -        | -        | -        | -        |
| TRAN         | 2        | -        | 3        | 4        | 4        | 4        | 5        |
| TRIM28       | -        | -        | -        | -        | -        | -        | -        |
| TSS          | -        | -        | -        | -        | -        | -        | -        |
| TSS_FLANK    | -        | -        | -        | -        | -        | -        | -        |
| USF1         | -        | -        | -        | -        | -        | -        | 2        |
| USF2         | -        | -        | -        | -        | -        | -        | -        |
| UTR3         | -        | -        | -        | -        | -        | -        | -        |
| UTR5         | -        | -        | -        | -        | -        | -        | -        |
| WEAK_ENH     | -        | -        | -        | -        | -        | -        | -        |
| WRNIP1       | -        | -        | -        | -        | -        | -        | -        |
| XRCC4        | -        | -        | -        | -        | -        | -        | -        |
| YY1          | -        | -        | -        | -        | -        | -        | -        |
| ZBTB33       | -        | -        | -        | -        | -        | -        | -        |
| ZBTB7A       | -        | -        | -        | -        | -        | -        | -        |
| ZEB1         | -        | -        | -        | -        | -        | -        | -        |
| ZNF143       | -        | -        | -        | -        | -        | -        | -        |
| ZNF263       | -        | -        | -        | -        | -        | -        | -        |
| ZNF274       | -        | -        | -        | -        | -        | -        | -        |
| ZZZ3         | -        | -        | -        | -        | -        | -        | -        |
| bound_motifs | -        | -        | -        | -        | 1        | 1        | -        |
| cpg_island   | -        | -        | -        | -        | -        | -        | -        |
| dnase_fps    | -        | -        | -        | -        | -        | -        | -        |
| in_cpg       | -        | -        | -        | 1        | -        | -        | -        |

| SNP             | rs174535   | rs174536   | rs174537   | rs102275   | rs102274   | rs174538   | rs174541   |
|-----------------|------------|------------|------------|------------|------------|------------|------------|
| Chromosome      | 11         | 11         | 11         | 11         | 11         | 11         | 11         |
| Position        | 61,551,356 | 61,551,927 | 61,552,680 | 61,557,803 | 61,557,826 | 61,560,081 | 61,565,908 |
| Region score    | 0.3        | 0.41       | 0.37       | 0.25       | 0.26       | 0.8        | 0.3        |
| TSS score       | 0.23       | 0.18       | 0.17       | 0.15       | 0.1        | 0.77       | 0.19       |
| Unmatched score | 0.42       | 0.45       | 0.38       | 0.62       | 0.54       | 0.98       | 0.35       |
| Average GERP    | 2.6233     | -0.67853   | -1.56768   | 0.14267    | 0.11224    | 0.45534    | -0.00782   |
| Average DAF     | 0.00066    | 0.00071    | 0.00071    | 0.00124    | 0.00124    | 0.00042    | 0.00039    |
| Average het     | 0.0005     | 0.00052    | 0.00051    | 0.00104    | 0.00105    | 0.00064    | 0.00055    |
| GERP            | 1.33       | -3.73      | -4.16      | 2.94       | -5.28      | 1.68       | 0.43       |
| %GC             | 58.4%      | 60.4%      | 63.4%      | 49.5%      | 50.5%      | 65.3%      | 56.4%      |
| TSS distance    | 1946       | 2517       | 3270       | 271        | 248        | 0          | 2495       |
| SS distance     | 33         | 67         | -589       | -41        | -18        | 53         | 1514       |
| ACCEPTOR        | -          | -          | -          | -          | -          | -          | -          |
| ATF3            | -          | -          | -          | -          | -          | -          | -          |
| BATF            | -          | -          | -          | -          | -          | -          | -          |
| BCL11A          | -          | -          | -          | -          | -          | -          | -          |
| BCL3            | -          | -          | -          | -          | -          | -          | -          |
| BCLAF1          | -          | -          | -          | -          | -          | -          | -          |
| BDP1            | -          | -          | -          | -          | -          | -          | -          |
| BHLHE40         | -          | -          | -          | -          | -          | -          | -          |
| BRCA1           | -          | -          | -          | -          | -          | -          | -          |
| BRF1            | -          | -          | -          | -          | -          | -          | -          |
| BRF2            | -          | -          | -          | -          | -          | -          | -          |
| CCNT2           | -          | -          | -          | -          | -          | -          | -          |
| CDS             | 1          | -          | -          | -          | -          | -          | -          |
| CEBPB           | -          | -          | -          | -          | -          | -          | -          |
| CHD2            | -          | -          | -          | -          | -          | -          | -          |
| CTBP2           | -          | -          | -          | -          | -          | -          | -          |
| CTCF            | -          | -          | -          | -          | -          | -          | -          |
| CTCF_L          | -          | -          | -          | -          | -          | -          | -          |
| CTCF_REG        | -          | -          | -          | -          | -          | -          | -          |
| DNase           | 1          | 1          | -          | -          | -          | 130        | 2          |
| DONOR           | -          | -          | -          | -          | -          | -          | -          |
| E2F1            | -          | -          | -          | -          | -          | 2          | -          |
| E2F4            | -          | -          | -          | -          | -          | -          | -          |
| E2F6            | -          | -          | -          | -          | -          | 1          | -          |
| EBF1            | -          | -          | -          | -          | -          | -          | -          |
| EGR1            | -          | -          | -          | -          | -          | -          | -          |
| ELF1            | -          | -          | -          | -          | -          | 3          | -          |
| ELK4            | -          | -          | -          | -          | -          | 1          | -          |
| ENH             | -          | -          | -          | -          | -          | -          | 1          |
| EP300           | -          | -          | -          | -          | -          | -          | -          |
| ERAPHA          | -          | -          | -          | -          | -          | -          | -          |
| ESRRA           | -          | -          | -          | -          | -          | -          | -          |
| ETS1            | -          | -          | -          | -          | -          | -          | -          |
| EXON            | 1          | 1          | 1          | 1          | 1          | 1          | -          |
| Eralphaa        | -          | -          | -          | -          | -          | -          | -          |
| FAIRE           | 1          | 2          | 1          | -          | -          | 10         | -          |
| FAM48A          | -          | -          | -          | -          | -          | -          | -          |
| FOS             | -          | -          | -          | -          | -          | -          | -          |
| FOSL1           | -          | -          | -          | -          | -          | -          | -          |
| FOSL2           | -          | -          | -          | -          | -          | -          | -          |
| FOXA1           | -          | -          | -          | -          | -          | -          | -          |
| FOXA2           | -          | -          | -          | -          | -          | -          | -          |
| GABPA           | -          | -          | -          | -          | -          | 5          | -          |
| GATA1           | -          | -          | -          | -          | -          | -          | -          |
| GATA2           | -          | -          | -          | -          | -          | -          | -          |

| SNP               | rs174535 | rs174536 | rs174537 | rs102275 | rs102274 | rs174538 | rs174541 |
|-------------------|----------|----------|----------|----------|----------|----------|----------|
| GATA3             | -        | -        | -        | -        | -        | -        | -        |
| GTF2B             | -        | -        | -        | -        | -        | -        | -        |
| GTF2F1            | -        | -        | -        | -        | -        | -        | -        |
| GTF3C2            | -        | -        | -        | -        | -        | -        | -        |
| H2AFZ             | -        | -        | -        | -        | -        | 6        | -        |
| H3K27ac           | 2        | 2        | -        | 3        | 4        | 12       | 5        |
| H3K27me3          | -        | -        | -        | -        | -        | 1        | -        |
| H3K36me3          | 10       | 18       | 26       | 27       | 27       | -        | 9        |
| H3K4me1           | 3        | 3        | 2        | 1        | 1        | 5        | 2        |
| H3K4me2           | -        | -        | -        | 1        | 1        | 13       | 1        |
| H3K4me3           | -        | 1        | -        | 3        | 3        | 18       | 1        |
| H3K79me2          | -        | -        | -        | 6        | 6        | 6        | 5        |
| H3K9ac            | 1        | 1        | 1        | 2        | 2        | 14       | 4        |
| H3K9me1           | -        | -        | -        | -        | -        | -        | -        |
| H3K9me3           | -        | -        | -        | -        | -        | -        | -        |
| H4K20me1          | -        | -        | -        | -        | -        | -        | -        |
| HDAC2             | -        | -        | -        | -        | -        | -        | -        |
| HDAC8             | -        | -        | -        | -        | -        | -        | -        |
| HEY1              | -        | -        | -        | -        | -        | 2        | -        |
| HMGN3             | -        | -        | -        | -        | -        | -        | -        |
| HNF4A             | -        | -        | -        | -        | -        | -        | -        |
| HNF4G             | -        | -        | -        | -        | -        | -        | -        |
| HSF1              | -        | -        | -        | -        | -        | -        | -        |
| INTRON            | 1        | 1        | 1        | 1        | 1        | -        | 1        |
| IRF1              | -        | -        | -        | -        | -        | -        | -        |
| IRF3              | -        | -        | -        | -        | -        | -        | -        |
| IRF4              | -        | -        | -        | -        | -        | -        | -        |
| JUN               | -        | -        | -        | -        | -        | -        | -        |
| JUNB              | -        | -        | -        | -        | -        | -        | -        |
| JUND              | -        | -        | -        | -        | -        | -        | -        |
| KAT2A             | -        | -        | -        | -        | -        | -        | -        |
| MAFF              | -        | -        | -        | -        | -        | -        | -        |
| MAFK              | -        | -        | -        | -        | -        | -        | -        |
| MAX               | -        | -        | -        | -        | -        | 1        | -        |
| MEF2A             | -        | -        | -        | -        | -        | -        | -        |
| MEF2_complex      | -        | -        | -        | -        | -        | -        | -        |
| MXI1              | -        | -        | -        | -        | -        | -        | -        |
| MYC               | -        | -        | -        | -        | -        | -        | -        |
| NANOG             | -        | -        | -        | -        | -        | -        | -        |
| NFE2              | -        | -        | -        | -        | -        | -        | -        |
| NFKB1             | -        | -        | -        | -        | -        | 3        | -        |
| NFYA              | -        | -        | -        | -        | -        | -        | -        |
| NFYB              | -        | -        | -        | -        | -        | -        | -        |
| NR2C2             | -        | -        | -        | -        | -        | -        | -        |
| NR3C1             | -        | -        | -        | -        | -        | -        | -        |
| NR4A1             | -        | -        | -        | -        | -        | -        | -        |
| NRF1              | -        | -        | -        | -        | -        | 1        | -        |
| PAX5              | -        | -        | -        | -        | -        | 1        | -        |
| PBX3              | -        | -        | -        | -        | -        | -        | -        |
| POLR2A            | -        | -        | -        | -        | -        | 45       | 1        |
| POLR2A_elongating | -        | -        | -        | -        | -        | 1        | -        |
| POLR3A            | -        | -        | -        | -        | -        | -        | -        |
| POU2F2            | -        | -        | -        | -        | -        | 1        | -        |
| POU5F1            | -        | -        | -        | -        | -        | -        | -        |
| PPARGC1A          | -        | -        | -        | -        | -        | -        | -        |
| PRDM1             | -        | -        | -        | -        | -        | -        | -        |
| RAD21             | -        | -        | -        | -        | -        | -        | -        |
| RDBP              | -        | -        | -        | -        | -        | -        | -        |

| SNP          | rs174535 | rs174536 | rs174537 | rs102275 | rs102274 | rs174538 | rs174541 |
|--------------|----------|----------|----------|----------|----------|----------|----------|
| REP          | -        | -        | -        | -        | -        | -        | -        |
| REST         | -        | -        | -        | -        | -        | -        | -        |
| RFX5         | -        | -        | -        | -        | -        | -        | -        |
| RXRA         | -        | -        | -        | -        | -        | -        | -        |
| SETDB1       | -        | -        | -        | -        | -        | -        | -        |
| SIN3A        | -        | -        | -        | -        | -        | 1        | -        |
| SIRT6        | -        | -        | -        | -        | -        | -        | -        |
| SIX5         | -        | -        | -        | -        | -        | 1        | -        |
| SLC22A2      | -        | -        | -        | -        | -        | 1        | -        |
| SMARCA4      | -        | -        | -        | -        | -        | -        | -        |
| SMARCB1      | -        | -        | -        | -        | -        | -        | -        |
| SMARCC1      | -        | -        | -        | -        | -        | -        | -        |
| SMARCC2      | -        | -        | -        | -        | -        | -        | -        |
| SMC3         | -        | -        | -        | -        | -        | -        | -        |
| SP1          | -        | -        | -        | -        | -        | -        | -        |
| SP2          | -        | -        | -        | -        | -        | -        | -        |
| SPI1         | -        | -        | -        | -        | -        | 3        | -        |
| SREBF1       | -        | -        | -        | -        | -        | -        | -        |
| SREBF2       | -        | -        | -        | -        | -        | -        | -        |
| SRF          | -        | -        | -        | -        | -        | 2        | -        |
| START        | -        | -        | -        | -        | -        | -        | -        |
| STAT1        | -        | -        | -        | -        | -        | -        | -        |
| STAT2        | -        | -        | -        | -        | -        | -        | -        |
| STAT3        | -        | -        | -        | -        | -        | -        | -        |
| STOP         | -        | -        | -        | -        | -        | -        | -        |
| SUZ12        | -        | -        | -        | -        | -        | -        | -        |
| TAF1         | -        | -        | -        | -        | -        | 8        | -        |
| TAF7         | -        | -        | -        | -        | -        | 1        | -        |
| TAL1         | -        | -        | -        | -        | -        | -        | -        |
| TBP          | -        | -        | -        | -        | -        | 5        | -        |
| TCF12        | -        | -        | -        | -        | -        | -        | -        |
| TCF7L2       | -        | -        | -        | -        | -        | -        | -        |
| TFAP2A       | -        | -        | -        | -        | -        | -        | -        |
| TFAP2C       | -        | -        | -        | -        | -        | -        | -        |
| THAP1        | -        | -        | -        | -        | -        | -        | -        |
| TRAN         | 6        | 6        | 6        | 6        | 6        | -        | 5        |
| TRIM28       | -        | -        | -        | -        | -        | -        | -        |
| TSS          | -        | -        | -        | -        | -        | 6        | -        |
| TSS_FLANK    | -        | -        | -        | -        | -        | -        | -        |
| USF1         | -        | -        | -        | -        | -        | -        | -        |
| USF2         | -        | -        | -        | -        | -        | -        | -        |
| UTR3         | -        | -        | -        | -        | -        | -        | -        |
| UTR5         | -        | -        | -        | -        | -        | 1        | -        |
| WEAK_ENH     | -        | -        | -        | -        | -        | -        | -        |
| WRNIP1       | -        | -        | -        | -        | -        | -        | -        |
| XRCC4        | -        | -        | -        | -        | -        | -        | -        |
| YY1          | -        | -        | -        | -        | -        | 6        | -        |
| ZBTB33       | -        | -        | -        | -        | -        | -        | -        |
| ZBTB7A       | -        | -        | -        | -        | -        | -        | -        |
| ZEB1         | -        | -        | -        | -        | -        | -        | -        |
| ZNF143       | -        | -        | -        | -        | -        | 1        | -        |
| ZNF263       | -        | -        | -        | -        | -        | -        | -        |
| ZNF274       | -        | -        | -        | -        | -        | -        | -        |
| ZZZ3         | -        | -        | -        | -        | -        | -        | -        |
| bound_motifs | -        | -        | -        | -        | -        | 1        | -        |
| cpg_island   | -        | -        | -        | -        | -        | 1        | -        |
| dnase_fps    | -        | -        | -        | -        | -        | 33       | -        |
| in_cpg       | -        | -        | -        | -        | -        | -        | -        |



| SNP             | rs174544   | rs174545   | rs174546   | rs174547   | rs174548   | rs174549   | rs174550   |
|-----------------|------------|------------|------------|------------|------------|------------|------------|
| Chromosome      | 11         | 11         | 11         | 11         | 11         | 11         | 11         |
| Position        | 61,567,753 | 61,569,306 | 61,569,830 | 61,570,783 | 61,571,348 | 61,571,382 | 61,571,478 |
| Region score    | 0.51       | 0.58       | 0.47       | 0.32       | 0.25       | 0.27       | 0.36       |
| TSS score       | 0.35       | 0.35       | 0.36       | 0.13       | 0.14       | 0.16       | 0.22       |
| Unmatched score | 0.44       | 0.62       | 0.56       | 0.28       | 0.56       | 0.54       | 0.63       |
| Average GERP    | 0.00461    | 0.0226     | -0.35256   | -0.79984   | -1.1267    | -1.02493   | -0.12015   |
| Average DAF     | 0.00034    | 0.00068    | 0.00068    | 0.00067    | 0.00202    | 0.00202    | 0.00202    |
| Average het     | 0.00049    | 0.00046    | 0.00047    | 0.00045    | 0.00134    | 0.00134    | 0.00134    |
| GERP            | 0.546      | 2.03       | 2.03       | -1.35      | -5.13      | -5.23      | 0.64       |
| %GC             | 61.4%      | 46.5%      | 54.5%      | 40.6%      | 51.5%      | 53.5%      | 49.5%      |
| TSS distance    | 4340       | 2845       | 2321       | 1368       | 803        | 769        | 673        |
| SS distance     | -2181      | -628       | -104       | -49        | 106        | 140        | 236        |
| ACCEPTOR        | -          | -          | -          | -          | -          | -          | -          |
| ATF3            | -          | -          | -          | -          | -          | -          | -          |
| BATF            | -          | -          | -          | -          | -          | -          | -          |
| BCL11A          | -          | -          | -          | -          | -          | -          | -          |
| BCL3            | -          | -          | -          | -          | -          | -          | -          |
| BCLAF1          | -          | -          | -          | -          | -          | -          | -          |
| BDP1            | -          | -          | -          | -          | -          | -          | -          |
| BHLHE40         | -          | -          | -          | -          | -          | -          | -          |
| BRCA1           | -          | -          | -          | -          | -          | -          | -          |
| BRF1            | -          | -          | -          | -          | -          | -          | -          |
| BRF2            | -          | -          | -          | -          | -          | -          | -          |
| CCNT2           | -          | -          | -          | -          | -          | -          | -          |
| CDS             | -          | -          | -          | -          | -          | -          | -          |
| CEBPB           | -          | -          | -          | -          | -          | -          | -          |
| CHD2            | -          | -          | -          | -          | -          | -          | -          |
| CTBP2           | -          | -          | -          | -          | -          | -          | -          |
| CTCF            | -          | -          | -          | -          | -          | -          | -          |
| CTCF_L          | -          | -          | -          | -          | -          | -          | -          |
| CTCF_REG        | -          | -          | -          | -          | -          | -          | -          |
| DNase           | -          | -          | 2          | -          | -          | -          | 1          |
| DONOR           | -          | -          | -          | -          | -          | -          | -          |
| E2F1            | -          | -          | -          | -          | -          | -          | -          |
| E2F4            | -          | -          | -          | -          | -          | -          | -          |
| E2F6            | -          | -          | -          | -          | -          | -          | -          |
| EBF1            | -          | -          | -          | -          | -          | -          | -          |
| EGR1            | -          | -          | -          | -          | -          | -          | -          |
| ELF1            | -          | -          | -          | -          | -          | -          | -          |
| ELK4            | -          | -          | -          | -          | -          | -          | -          |
| ENH             | 1          | -          | -          | -          | -          | -          | -          |
| EP300           | -          | -          | -          | -          | -          | -          | -          |
| ERAPHA          | -          | -          | -          | -          | -          | -          | -          |
| ESRRA           | -          | -          | -          | -          | -          | -          | -          |
| ETS1            | -          | -          | -          | -          | -          | -          | -          |
| EXON            | 1          | 1          | 1          | -          | 1          | 1          | 1          |
| Eralphaa        | -          | -          | -          | -          | -          | -          | -          |
| FAIRE           | -          | -          | -          | -          | -          | -          | -          |
| FAM48A          | -          | -          | -          | -          | -          | -          | -          |
| FOS             | -          | -          | -          | -          | -          | -          | -          |
| FOSL1           | -          | -          | -          | -          | -          | -          | -          |
| FOSL2           | -          | -          | -          | -          | -          | -          | -          |
| FOXA1           | -          | -          | -          | -          | -          | -          | -          |
| FOXA2           | -          | -          | -          | -          | -          | -          | -          |
| GABPA           | -          | -          | -          | -          | -          | -          | -          |
| GATA1           | -          | -          | -          | -          | -          | -          | -          |
| GATA2           | -          | -          | -          | -          | -          | -          | -          |

| SNP               | rs174544 | rs174545 | rs174546 | rs174547 | rs174548 | rs174549 | rs174550 |
|-------------------|----------|----------|----------|----------|----------|----------|----------|
| GATA3             | -        | -        | -        | -        | -        | -        | -        |
| GTF2B             | -        | -        | -        | -        | -        | -        | -        |
| GTF2F1            | -        | -        | -        | -        | -        | -        | -        |
| GTF3C2            | -        | -        | -        | -        | -        | -        | -        |
| H2AFZ             | -        | -        | -        | -        | -        | -        | -        |
| H3K27ac           | 3        | 1        | 2        | 2        | 2        | 2        | 2        |
| H3K27me3          | -        | -        | -        | -        | -        | -        | -        |
| H3K36me3          | 15       | 14       | 25       | 26       | 25       | 25       | 25       |
| H3K4me1           | 4        | 3        | 3        | 2        | 4        | 4        | 4        |
| H3K4me2           | 1        | 1        | 1        | 1        | -        | -        | -        |
| H3K4me3           | -        | -        | -        | -        | -        | -        | -        |
| H3K79me2          | 4        | 4        | 3        | 3        | 2        | 2        | 2        |
| H3K9ac            | 2        | 3        | 3        | 3        | 3        | 3        | 3        |
| H3K9me1           | -        | -        | -        | -        | -        | -        | -        |
| H3K9me3           | -        | -        | -        | -        | -        | -        | -        |
| H4K20me1          | -        | -        | -        | -        | -        | -        | -        |
| HDAC2             | -        | -        | -        | -        | -        | -        | -        |
| HDAC8             | -        | -        | -        | -        | -        | -        | -        |
| HEY1              | -        | -        | -        | -        | -        | -        | -        |
| HMGN3             | -        | -        | -        | -        | -        | -        | -        |
| HNF4A             | -        | -        | -        | -        | -        | -        | -        |
| HNF4G             | -        | -        | -        | -        | -        | -        | -        |
| HSF1              | -        | -        | -        | -        | -        | -        | -        |
| INTRON            | 1        | 1        | 1        | 1        | 1        | 1        | 1        |
| IRF1              | -        | -        | -        | -        | -        | -        | -        |
| IRF3              | -        | -        | -        | -        | -        | -        | -        |
| IRF4              | -        | -        | -        | -        | -        | -        | -        |
| JUN               | -        | -        | -        | -        | -        | -        | -        |
| JUNB              | -        | -        | -        | -        | -        | -        | -        |
| JUND              | -        | -        | -        | -        | -        | -        | -        |
| KAT2A             | -        | -        | -        | -        | -        | -        | -        |
| MAFF              | -        | -        | -        | -        | -        | -        | -        |
| MAFK              | -        | -        | -        | -        | -        | -        | -        |
| MAX               | -        | -        | -        | -        | -        | -        | -        |
| MEF2A             | -        | -        | -        | -        | -        | -        | -        |
| MEF2_complex      | -        | -        | -        | -        | -        | -        | -        |
| MXI1              | -        | -        | -        | -        | -        | -        | -        |
| MYC               | -        | -        | -        | -        | -        | -        | -        |
| NANOG             | -        | -        | -        | -        | -        | -        | -        |
| NFE2              | -        | -        | -        | -        | -        | -        | -        |
| NFKB1             | -        | -        | -        | -        | -        | -        | -        |
| NFYA              | -        | -        | -        | -        | -        | -        | -        |
| NFYB              | -        | -        | -        | -        | -        | -        | -        |
| NR2C2             | -        | -        | -        | -        | -        | -        | -        |
| NR3C1             | -        | -        | -        | -        | -        | -        | -        |
| NR4A1             | -        | -        | -        | -        | -        | -        | -        |
| NRF1              | -        | -        | -        | -        | -        | -        | -        |
| PAX5              | -        | -        | -        | -        | -        | -        | -        |
| PBX3              | -        | -        | -        | -        | -        | -        | -        |
| POLR2A            | -        | -        | -        | -        | -        | -        | 2        |
| POLR2A_elongating | -        | -        | -        | -        | -        | -        | -        |
| POLR3A            | -        | -        | -        | -        | -        | -        | -        |
| POU2F2            | -        | -        | -        | -        | -        | -        | -        |
| POU5F1            | -        | -        | -        | -        | -        | -        | -        |
| PPARGC1A          | -        | -        | -        | -        | -        | -        | -        |
| PRDM1             | -        | -        | -        | -        | -        | -        | -        |
| RAD21             | -        | -        | -        | -        | -        | -        | -        |
| RDBP              | -        | -        | -        | -        | -        | -        | -        |

| SNP          | rs174544 | rs174545 | rs174546 | rs174547 | rs174548 | rs174549 | rs174550 |
|--------------|----------|----------|----------|----------|----------|----------|----------|
| REP          | -        | -        | -        | -        | -        | -        | -        |
| REST         | -        | -        | -        | -        | -        | -        | -        |
| RFX5         | -        | -        | -        | -        | -        | -        | -        |
| RXRA         | -        | -        | -        | -        | -        | -        | -        |
| SETDB1       | -        | -        | -        | -        | -        | -        | -        |
| SIN3A        | -        | -        | -        | -        | -        | -        | -        |
| SIRT6        | -        | -        | -        | -        | -        | -        | -        |
| SIX5         | -        | -        | -        | -        | -        | -        | -        |
| SLC22A2      | -        | -        | -        | -        | -        | -        | -        |
| SMARCA4      | -        | -        | -        | -        | -        | -        | -        |
| SMARCB1      | -        | -        | -        | -        | -        | -        | -        |
| SMARCC1      | -        | -        | -        | -        | -        | -        | -        |
| SMARCC2      | -        | -        | -        | -        | -        | -        | -        |
| SMC3         | -        | -        | -        | -        | -        | -        | -        |
| SP1          | -        | -        | -        | -        | -        | -        | -        |
| SP2          | -        | -        | -        | -        | -        | -        | -        |
| SPI1         | -        | -        | -        | -        | -        | -        | -        |
| SREBF1       | -        | -        | -        | -        | -        | -        | -        |
| SREBF2       | -        | -        | -        | -        | -        | -        | -        |
| SRF          | -        | -        | -        | -        | -        | -        | -        |
| START        | -        | -        | -        | -        | -        | -        | -        |
| STAT1        | -        | -        | -        | -        | -        | -        | -        |
| STAT2        | -        | -        | -        | -        | -        | -        | -        |
| STAT3        | -        | -        | -        | -        | -        | -        | -        |
| STOP         | -        | -        | -        | -        | -        | -        | -        |
| SUZ12        | -        | -        | -        | -        | -        | -        | -        |
| TAF1         | -        | -        | -        | -        | -        | -        | -        |
| TAF7         | -        | -        | -        | -        | -        | -        | -        |
| TAL1         | -        | -        | -        | -        | -        | -        | -        |
| TBP          | -        | -        | -        | -        | -        | -        | -        |
| TCF12        | -        | -        | -        | -        | -        | -        | -        |
| TCF7L2       | -        | -        | -        | -        | -        | -        | -        |
| TFAP2A       | -        | -        | -        | -        | -        | -        | -        |
| TFAP2C       | -        | -        | -        | -        | -        | -        | -        |
| THAP1        | -        | -        | -        | -        | -        | -        | -        |
| TRAN         | 5        | 6        | 5        | 6        | 6        | 6        | 6        |
| TRIM28       | -        | -        | -        | -        | -        | -        | -        |
| TSS          | -        | -        | -        | -        | -        | -        | -        |
| TSS_FLANK    | -        | -        | -        | -        | -        | -        | -        |
| USF1         | -        | -        | -        | -        | -        | -        | -        |
| USF2         | -        | -        | -        | -        | -        | -        | -        |
| UTR3         | 1        | 1        | 1        | -        | -        | -        | -        |
| UTR5         | -        | -        | -        | -        | 1        | 1        | 1        |
| WEAK_ENH     | -        | -        | -        | -        | -        | -        | -        |
| WRNIP1       | -        | -        | -        | -        | -        | -        | -        |
| XRCC4        | -        | -        | -        | -        | -        | -        | -        |
| YY1          | -        | -        | -        | -        | -        | -        | -        |
| ZBTB33       | -        | -        | -        | -        | -        | -        | -        |
| ZBTB7A       | -        | -        | -        | -        | -        | -        | -        |
| ZEB1         | -        | -        | -        | -        | -        | -        | -        |
| ZNF143       | -        | -        | -        | -        | -        | -        | -        |
| ZNF263       | -        | -        | -        | -        | -        | -        | -        |
| ZNF274       | -        | -        | -        | -        | -        | -        | -        |
| ZZZ3         | -        | -        | -        | -        | -        | -        | -        |
| bound_motifs | -        | -        | -        | -        | -        | -        | -        |
| cpg_island   | -        | -        | -        | -        | -        | -        | -        |
| dnase_fps    | -        | -        | -        | -        | -        | -        | -        |
| in_cpg       | -        | -        | -        | -        | -        | -        | -        |

| SNP             | rs174553   | rs7264355  | rs174554   | rs174555   | rs174556   | rs174559   | rs174560   |
|-----------------|------------|------------|------------|------------|------------|------------|------------|
| Chromosome      | 11         | 11         | 11         | 11         | 11         | 11         | 11         |
| Position        | 61,575,158 | 61,579,427 | 61,579,463 | 61,579,760 | 61,580,635 | 61,581,656 | 61,581,764 |
| Region score    | 0.33       | 0.08       | 0.14       | 0.19       | 0.45       | 0.27       | 0.2        |
| TSS score       | 0.12       | 0.11       | 0.13       | 0.12       | 0.34       | 0.23       | 0.19       |
| Unmatched score | 0.25       | 0.36       | 0.27       | 0.48       | 0.45       | 0.68       | 0.79       |
| Average GERP    | -1.03263   | 0.0876     | 0.11761    | -0.98534   | -0.21083   | 0.04866    | -0.67002   |
| Average DAF     | 0.00069    | 0.00255    | 0.00255    | 0.00255    | 0.00032    | 0.00094    | 0.00095    |
| Average het     | 0.00049    | 0.00122    | 0.00122    | 0.0012     | 0.00046    | 0.00088    | 0.00088    |
| GERP            | -0.144     | -0.47      | 0.158      | -7.33      | 2.81       | 0.122      | 1.52       |
| %GC             | 53.5%      | 53.5%      | 51.5%      | 46.5%      | 50.5%      | 56.4%      | 49.5%      |
| TSS distance    | -1157      | 527        | 491        | 194        | -679       | 464        | 356        |
| SS distance     | 959        | -23        | 10         | -180       | -77        | 42         | 150        |
| ACCEPTOR        | -          | -          | -          | -          | -          | -          | -          |
| ATF3            | -          | -          | -          | -          | -          | -          | -          |
| BATF            | -          | -          | -          | -          | -          | -          | -          |
| BCL11A          | -          | -          | -          | -          | -          | -          | -          |
| BCL3            | -          | -          | -          | -          | -          | -          | -          |
| BCLAF1          | -          | -          | -          | -          | -          | -          | -          |
| BDP1            | -          | -          | -          | -          | -          | -          | -          |
| BHLHE40         | -          | -          | -          | -          | -          | -          | -          |
| BRCA1           | -          | -          | -          | -          | -          | -          | -          |
| BRF1            | -          | -          | -          | -          | -          | -          | -          |
| BRF2            | -          | -          | -          | -          | -          | -          | -          |
| CCNT2           | -          | -          | -          | -          | -          | -          | -          |
| CDS             | -          | 1          | -          | -          | -          | -          | -          |
| CEBPB           | -          | -          | -          | -          | 2          | -          | -          |
| CHD2            | -          | -          | -          | -          | -          | -          | -          |
| CTBP2           | -          | -          | -          | -          | -          | -          | -          |
| CTCF            | -          | -          | -          | -          | -          | -          | -          |
| CTCF_L          | -          | -          | -          | -          | -          | -          | -          |
| CTCF_REG        | -          | -          | -          | -          | -          | -          | -          |
| DNase           | -          | -          | -          | -          | -          | -          | 1          |
| DONOR           | -          | -          | -          | -          | -          | -          | -          |
| E2F1            | -          | -          | -          | -          | -          | -          | -          |
| E2F4            | -          | -          | -          | -          | -          | -          | -          |
| E2F6            | -          | -          | -          | -          | -          | -          | -          |
| EBF1            | -          | -          | -          | -          | -          | -          | -          |
| EGR1            | -          | -          | -          | -          | -          | -          | -          |
| ELF1            | -          | -          | -          | -          | -          | -          | -          |
| ELK4            | -          | -          | -          | -          | -          | -          | -          |
| ENH             | -          | -          | -          | -          | -          | -          | 1          |
| EP300           | -          | -          | -          | -          | -          | -          | -          |
| ERALPHAA        | -          | -          | -          | -          | -          | -          | -          |
| ESRRA           | -          | -          | -          | -          | -          | -          | -          |
| ETS1            | -          | -          | -          | -          | -          | -          | -          |
| EXON            | -          | 1          | -          | -          | -          | 1          | 1          |
| Eralphaa        | -          | -          | -          | -          | -          | -          | -          |
| FAIRE           | -          | -          | -          | -          | -          | 1          | -          |
| FAM48A          | -          | -          | -          | -          | -          | -          | -          |
| FOS             | -          | -          | -          | -          | -          | -          | -          |
| FOSL1           | -          | -          | -          | -          | -          | -          | -          |
| FOSL2           | -          | -          | -          | -          | -          | -          | -          |
| FOXA1           | -          | -          | -          | -          | -          | -          | -          |
| FOXA2           | -          | -          | -          | -          | -          | -          | -          |
| GABPA           | -          | -          | -          | -          | -          | -          | -          |
| GATA1           | -          | -          | -          | -          | -          | -          | -          |
| GATA2           | -          | -          | -          | -          | -          | -          | -          |

| SNP               | rs174553 | rs7264355 | rs174554 | rs174555 | rs174556 | rs174559 | rs174560 |
|-------------------|----------|-----------|----------|----------|----------|----------|----------|
| GATA3             | -        | -         | -        | -        | -        | -        | -        |
| GTF2B             | -        | -         | -        | -        | -        | -        | -        |
| GTF2F1            | -        | -         | -        | -        | -        | -        | -        |
| GTF3C2            | -        | -         | -        | -        | -        | -        | -        |
| H2AFZ             | -        | -         | -        | -        | -        | 3        | 3        |
| H3K27ac           | -        | -         | -        | 1        | 1        | 10       | 10       |
| H3K27me3          | -        | -         | -        | -        | -        | -        | -        |
| H3K36me3          | 17       | 27        | 27       | 27       | 26       | 5        | 5        |
| H3K4me1           | 2        | 3         | 3        | 3        | 3        | 8        | 8        |
| H3K4me2           | -        | 1         | 1        | 2        | 2        | 9        | 12       |
| H3K4me3           | -        | 1         | 1        | 2        | 1        | 8        | 8        |
| H3K79me2          | -        | 2         | 2        | 3        | 3        | 4        | 4        |
| H3K9ac            | 1        | 2         | 2        | 2        | 2        | 7        | 9        |
| H3K9me1           | -        | -         | -        | -        | -        | -        | -        |
| H3K9me3           | -        | -         | -        | -        | -        | -        | -        |
| H4K20me1          | -        | -         | -        | -        | -        | -        | -        |
| HDAC2             | -        | -         | -        | -        | -        | -        | -        |
| HDAC8             | -        | -         | -        | -        | -        | -        | -        |
| HEY1              | -        | -         | -        | -        | -        | -        | -        |
| HMGN3             | -        | -         | -        | -        | -        | -        | -        |
| HNF4A             | -        | -         | -        | -        | -        | -        | -        |
| HNF4G             | -        | -         | -        | -        | -        | -        | -        |
| HSF1              | -        | -         | -        | -        | -        | -        | -        |
| INTRON            | 1        | 1         | 1        | 1        | 1        | 1        | 1        |
| IRF1              | -        | -         | -        | -        | -        | -        | -        |
| IRF3              | -        | -         | -        | -        | -        | -        | -        |
| IRF4              | -        | -         | -        | -        | -        | -        | -        |
| JUN               | -        | -         | -        | -        | -        | -        | -        |
| JUNB              | -        | -         | -        | -        | -        | -        | -        |
| JUND              | -        | -         | -        | -        | -        | -        | -        |
| KAT2A             | -        | -         | -        | -        | -        | -        | -        |
| MAFF              | -        | -         | -        | -        | -        | -        | -        |
| MAFK              | -        | -         | -        | -        | -        | -        | -        |
| MAX               | -        | -         | -        | -        | -        | -        | -        |
| MEF2A             | -        | -         | -        | -        | -        | -        | -        |
| MEF2_complex      | -        | -         | -        | -        | -        | -        | -        |
| MXI1              | -        | -         | -        | -        | -        | -        | -        |
| MYC               | -        | -         | -        | -        | -        | -        | -        |
| NANOG             | -        | -         | -        | -        | -        | -        | -        |
| NFE2              | -        | -         | -        | -        | -        | -        | -        |
| NFKB1             | -        | -         | -        | -        | -        | -        | -        |
| NFYA              | -        | -         | -        | -        | -        | -        | -        |
| NFYB              | -        | -         | -        | -        | -        | -        | -        |
| NR2C2             | -        | -         | -        | -        | -        | -        | -        |
| NR3C1             | -        | -         | -        | -        | -        | -        | -        |
| NR4A1             | -        | -         | -        | -        | -        | -        | -        |
| NRF1              | -        | -         | -        | -        | -        | -        | -        |
| PAX5              | -        | -         | -        | -        | -        | -        | -        |
| PBX3              | -        | -         | -        | -        | -        | -        | -        |
| POLR2A            | -        | -         | -        | -        | -        | 2        | 2        |
| POLR2A_elongating | -        | -         | -        | -        | -        | -        | -        |
| POLR3A            | -        | -         | -        | -        | -        | -        | -        |
| POU2F2            | -        | -         | -        | -        | -        | -        | -        |
| POU5F1            | -        | -         | -        | -        | -        | -        | -        |
| PPARGC1A          | -        | -         | -        | -        | -        | -        | -        |
| PRDM1             | -        | -         | -        | -        | -        | -        | -        |
| RAD21             | -        | -         | -        | -        | -        | -        | -        |
| RDBP              | -        | -         | -        | -        | -        | -        | -        |

| SNP          | rs174553 | rs7264355 | rs174554 | rs174555 | rs174556 | rs174559 | rs174560 |
|--------------|----------|-----------|----------|----------|----------|----------|----------|
| REP          | -        | -         | -        | -        | -        | -        | -        |
| REST         | -        | -         | -        | -        | -        | -        | -        |
| RFX5         | -        | -         | -        | -        | -        | -        | -        |
| RXRA         | -        | -         | -        | -        | -        | -        | -        |
| SETDB1       | -        | -         | -        | -        | -        | -        | -        |
| SIN3A        | -        | -         | -        | -        | -        | -        | -        |
| SIRT6        | -        | -         | -        | -        | -        | -        | -        |
| SIX5         | -        | -         | -        | -        | -        | -        | -        |
| SLC22A2      | -        | -         | -        | -        | -        | -        | -        |
| SMARCA4      | -        | -         | -        | -        | -        | -        | -        |
| SMARCB1      | -        | -         | -        | -        | -        | -        | -        |
| SMARCC1      | -        | -         | -        | -        | -        | -        | -        |
| SMARCC2      | -        | -         | -        | -        | -        | -        | -        |
| SMC3         | -        | -         | -        | -        | -        | -        | -        |
| SP1          | -        | -         | -        | -        | -        | -        | -        |
| SP2          | -        | -         | -        | -        | -        | -        | -        |
| SPI1         | -        | -         | -        | -        | -        | -        | -        |
| SREBF1       | -        | -         | -        | -        | -        | -        | -        |
| SREBF2       | -        | -         | -        | -        | -        | -        | -        |
| SRF          | -        | -         | -        | -        | -        | -        | -        |
| START        | -        | -         | -        | -        | -        | -        | -        |
| STAT1        | -        | -         | -        | -        | -        | -        | -        |
| STAT2        | -        | -         | -        | -        | -        | -        | -        |
| STAT3        | -        | -         | -        | -        | -        | -        | -        |
| STOP         | -        | -         | -        | -        | -        | -        | -        |
| SUZ12        | -        | -         | -        | -        | -        | -        | -        |
| TAF1         | -        | -         | -        | -        | -        | -        | -        |
| TAF7         | -        | -         | -        | -        | -        | -        | -        |
| TAL1         | -        | -         | -        | -        | -        | -        | -        |
| TBP          | -        | -         | -        | -        | -        | -        | -        |
| TCF12        | -        | -         | -        | -        | -        | -        | -        |
| TCF7L2       | -        | -         | -        | -        | -        | -        | -        |
| TFAP2A       | -        | -         | -        | -        | -        | -        | -        |
| TFAP2C       | -        | -         | -        | -        | -        | -        | -        |
| THAP1        | -        | -         | -        | -        | -        | -        | -        |
| TRAN         | 6        | 6         | 6        | 6        | 6        | 2        | 2        |
| TRIM28       | -        | -         | -        | -        | -        | -        | -        |
| TSS          | -        | -         | -        | -        | -        | -        | -        |
| TSS_FLANK    | -        | -         | -        | -        | -        | -        | -        |
| USF1         | -        | -         | -        | -        | -        | -        | -        |
| USF2         | -        | -         | -        | -        | -        | -        | -        |
| UTR3         | -        | -         | -        | -        | -        | -        | -        |
| UTR5         | -        | -         | -        | -        | -        | -        | -        |
| WEAK_ENH     | -        | -         | -        | -        | -        | -        | -        |
| WRNIP1       | -        | -         | -        | -        | -        | -        | -        |
| XRCC4        | -        | -         | -        | -        | -        | -        | -        |
| YY1          | -        | -         | -        | -        | -        | -        | -        |
| ZBTB33       | -        | -         | -        | -        | -        | -        | -        |
| ZBTB7A       | -        | -         | -        | -        | -        | -        | -        |
| ZEB1         | -        | -         | -        | -        | -        | -        | -        |
| ZNF143       | -        | -         | -        | -        | -        | -        | -        |
| ZNF263       | -        | -         | -        | -        | -        | -        | -        |
| ZNF274       | -        | -         | -        | -        | -        | -        | -        |
| ZZZ3         | -        | -         | -        | -        | -        | -        | -        |
| bound_motifs | -        | -         | -        | -        | -        | -        | -        |
| cpg_island   | -        | -         | -        | -        | -        | -        | -        |
| dnase_fps    | -        | -         | -        | -        | -        | -        | -        |
| in_cpg       | -        | -         | -        | -        | -        | -        | -        |

| SNP             | rs174561   | rs174562   | rs174566   | rs174568   | rs99780    | rs174570   | rs1535     |
|-----------------|------------|------------|------------|------------|------------|------------|------------|
| Chromosome      | 11         | 11         | 11         | 11         | 11         | 11         | 11         |
| Position        | 61,582,708 | 61,585,144 | 61,592,362 | 61,593,816 | 61,596,633 | 61,597,212 | 61,597,972 |
| Region score    | 0.53       | 0.36       | 0.16       | 0.35       | 0.23       | 0.45       | 0.32       |
| TSS score       | 0.33       | 0.5        | 0.18       | 0.44       | 0.36       | 0.3        | 0.44       |
| Unmatched score | 0.95       | 0.88       | 0.17       | 0.85       | 0.92       | 0.77       | 0.72       |
| Average GERP    | -0.02572   | -0.70901   | 0.12565    | -0.61491   | -0.55413   | -0.76345   | -0.76724   |
| Average DAF     | 0.00075    | 0.00071    | 0.00292    | 0.00041    | 0.00061    | 0.00026    | 0.00087    |
| Average het     | 0.00054    | 0.00052    | 0.0016     | 0.0006     | 0.00052    | 0.0004     | 0.00083    |
| GERP            | 2.22       | 0.315      | 0.575      | -0.992     | -2.45      | -1.9       | -0.318     |
| %GC             | 67.3%      | 50.5%      | 48.5%      | 67.3%      | 55.4%      | 48.5%      | 40.6%      |
| TSS distance    | 3          | -474       | -2501      | -1047      | 147        | -421       | -1181      |
| SS distance     | 162        | 680        | -1139      | 61         | -37        | 539        | 1299       |
| ACCEPTOR        | -          | -          | -          | -          | -          | -          | -          |
| ATF3            | -          | -          | -          | -          | -          | -          | -          |
| BATF            | -          | -          | -          | -          | -          | -          | -          |
| BCL11A          | -          | -          | -          | -          | -          | -          | -          |
| BCL3            | -          | -          | -          | -          | -          | -          | -          |
| BCLAF1          | -          | -          | -          | -          | -          | -          | -          |
| BDP1            | -          | -          | -          | -          | -          | -          | -          |
| BHLHE40         | -          | -          | -          | -          | -          | -          | -          |
| BRCA1           | -          | -          | -          | -          | -          | -          | -          |
| BRF1            | -          | -          | -          | -          | -          | -          | -          |
| BRF2            | -          | -          | -          | -          | -          | -          | -          |
| CCNT2           | -          | -          | -          | -          | -          | -          | -          |
| CDS             | -          | -          | -          | 1          | -          | -          | -          |
| CEBPB           | -          | -          | -          | -          | -          | -          | -          |
| CHD2            | -          | -          | -          | -          | -          | -          | -          |
| CTBP2           | -          | -          | -          | -          | -          | -          | -          |
| CTCF            | -          | -          | -          | -          | -          | -          | -          |
| CTCF_L          | -          | -          | -          | -          | -          | -          | -          |
| CTCF_REG        | -          | -          | -          | -          | -          | -          | -          |
| DNase           | 105        | 5          | -          | -          | 16         | -          | 7          |
| DONOR           | -          | -          | -          | -          | -          | -          | -          |
| E2F1            | -          | -          | -          | -          | -          | -          | -          |
| E2F4            | -          | -          | -          | -          | -          | -          | -          |
| E2F6            | -          | -          | -          | -          | -          | -          | -          |
| EBF1            | -          | -          | -          | -          | -          | -          | -          |
| EGR1            | -          | -          | -          | -          | -          | -          | -          |
| ELF1            | -          | -          | -          | -          | -          | -          | -          |
| ELK4            | -          | -          | -          | -          | -          | -          | -          |
| ENH             | -          | 1          | -          | -          | -          | -          | -          |
| EP300           | -          | -          | -          | -          | -          | -          | -          |
| ERALPHAA        | -          | -          | -          | -          | -          | -          | 1          |
| ESRRA           | -          | -          | -          | -          | -          | -          | -          |
| ETS1            | -          | -          | -          | -          | -          | -          | -          |
| EXON            | 1          | -          | -          | 1          | -          | -          | -          |
| Eralphaa        | -          | -          | -          | -          | -          | -          | 1          |
| FAIRE           | 9          | -          | -          | 3          | 1          | 2          | 3          |
| FAM48A          | -          | -          | -          | -          | -          | -          | -          |
| FOS             | -          | -          | -          | -          | -          | -          | -          |
| FOSL1           | -          | -          | -          | -          | -          | -          | -          |
| FOSL2           | -          | -          | -          | -          | -          | -          | -          |
| FOXA1           | -          | -          | -          | -          | -          | -          | -          |
| FOXA2           | -          | -          | -          | -          | -          | -          | -          |
| GABPA           | -          | -          | -          | -          | -          | -          | -          |
| GATA1           | -          | -          | -          | -          | -          | -          | -          |
| GATA2           | -          | -          | -          | -          | -          | -          | -          |

| SNP               | rs174561 | rs174562 | rs174566 | rs174568 | rs99780 | rs174570 | rs1535 |
|-------------------|----------|----------|----------|----------|---------|----------|--------|
| GATA3             | 1        | -        | -        | -        | -       | -        | -      |
| GTF2B             | -        | -        | -        | -        | -       | -        | -      |
| GTF2F1            | -        | -        | -        | -        | -       | -        | -      |
| GTF3C2            | -        | -        | -        | -        | -       | -        | -      |
| H2AFZ             | 4        | 5        | -        | -        | 5       | 1        | 1      |
| H3K27ac           | 11       | 9        | -        | 3        | 10      | 8        | 4      |
| H3K27me3          | -        | -        | -        | -        | 1       | 1        | -      |
| H3K36me3          | 2        | -        | -        | 1        | 1       | 2        | 2      |
| H3K4me1           | 8        | 7        | -        | 2        | 10      | 13       | 11     |
| H3K4me2           | 13       | 13       | -        | 2        | 11      | 11       | 11     |
| H3K4me3           | 14       | 14       | -        | 4        | 17      | 17       | 15     |
| H3K79me2          | 4        | 3        | -        | 1        | 3       | 3        | 3      |
| H3K9ac            | 14       | 14       | -        | 4        | 11      | 11       | 8      |
| H3K9me1           | -        | -        | -        | -        | -       | -        | -      |
| H3K9me3           | -        | -        | -        | -        | -       | -        | -      |
| H4K20me1          | -        | -        | -        | -        | 2       | 3        | 3      |
| HDAC2             | -        | -        | -        | -        | -       | -        | -      |
| HDAC8             | -        | -        | -        | -        | -       | -        | -      |
| HEY1              | -        | -        | -        | -        | -       | -        | -      |
| HMGN3             | 1        | -        | -        | -        | -       | -        | -      |
| HNF4A             | -        | -        | -        | -        | -       | -        | -      |
| HNF4G             | -        | -        | -        | -        | -       | -        | -      |
| HSF1              | -        | -        | -        | -        | -       | -        | -      |
| INTRON            | 1        | 1        | 1        | 1        | 1       | 1        | 1      |
| IRF1              | 1        | -        | -        | -        | -       | -        | -      |
| IRF3              | -        | -        | -        | -        | -       | -        | -      |
| IRF4              | -        | -        | -        | -        | -       | -        | -      |
| JUN               | -        | -        | -        | -        | -       | -        | -      |
| JUNB              | -        | -        | -        | -        | -       | -        | -      |
| JUND              | -        | -        | -        | -        | -       | -        | -      |
| KAT2A             | -        | -        | -        | -        | -       | -        | -      |
| MAFF              | -        | -        | -        | -        | -       | -        | -      |
| MAFK              | -        | -        | -        | -        | -       | -        | -      |
| MAX               | -        | -        | -        | -        | -       | -        | -      |
| MEF2A             | -        | -        | -        | -        | -       | -        | -      |
| MEF2_complex      | -        | -        | -        | -        | -       | -        | -      |
| MXI1              | 1        | -        | -        | -        | -       | -        | -      |
| MYC               | -        | -        | -        | -        | -       | -        | -      |
| NANOG             | 1        | -        | -        | -        | -       | -        | -      |
| NFE2              | -        | -        | -        | -        | -       | -        | -      |
| NFKB1             | -        | -        | -        | -        | -       | -        | -      |
| NFYA              | -        | -        | -        | -        | -       | -        | -      |
| NFYB              | 1        | -        | -        | -        | -       | -        | -      |
| NR2C2             | -        | -        | -        | -        | -       | -        | -      |
| NR3C1             | -        | -        | -        | -        | -       | -        | -      |
| NR4A1             | -        | -        | -        | -        | -       | -        | -      |
| NRF1              | 4        | -        | -        | -        | -       | -        | -      |
| PAX5              | 1        | -        | -        | -        | -       | -        | -      |
| PBX3              | -        | -        | -        | -        | -       | -        | -      |
| POLR2A            | 7        | -        | -        | -        | 2       | -        | -      |
| POLR2A_elongating | 1        | -        | -        | -        | -       | -        | -      |
| POLR3A            | -        | -        | -        | -        | -       | -        | -      |
| POU2F2            | -        | -        | -        | -        | -       | -        | -      |
| POU5F1            | -        | -        | -        | -        | -       | -        | -      |
| PPARGC1A          | -        | -        | -        | -        | -       | -        | -      |
| PRDM1             | -        | -        | -        | -        | -       | -        | -      |
| RAD21             | -        | -        | -        | -        | -       | -        | -      |
| RDBP              | -        | -        | -        | -        | -       | -        | -      |



| SNP          | rs174561 | rs174562 | rs174566 | rs174568 | rs99780 | rs174570 | rs1535 |
|--------------|----------|----------|----------|----------|---------|----------|--------|
| REP          | -        | -        | 3        | 1        | -       | -        | 1      |
| REST         | -        | -        | -        | -        | -       | -        | -      |
| RFX5         | 1        | -        | -        | -        | -       | -        | -      |
| RXRA         | -        | -        | -        | -        | -       | -        | -      |
| SETDB1       | -        | -        | -        | -        | -       | -        | -      |
| SIN3A        | -        | -        | -        | -        | -       | -        | -      |
| SIRT6        | -        | -        | -        | -        | -       | -        | -      |
| SIX5         | -        | -        | -        | -        | -       | -        | -      |
| SLC22A2      | -        | -        | -        | -        | -       | -        | -      |
| SMARCA4      | -        | -        | -        | -        | -       | -        | -      |
| SMARCB1      | -        | -        | -        | -        | -       | -        | -      |
| SMARCC1      | -        | -        | -        | -        | -       | -        | -      |
| SMARCC2      | -        | -        | -        | -        | -       | -        | -      |
| SMC3         | -        | -        | -        | -        | -       | -        | -      |
| SP1          | 1        | -        | -        | -        | -       | -        | -      |
| SP2          | -        | -        | -        | -        | -       | -        | -      |
| SPI1         | -        | -        | -        | -        | -       | -        | -      |
| SREBF1       | 2        | -        | -        | -        | -       | -        | -      |
| SREBF2       | -        | -        | -        | -        | -       | -        | -      |
| SRF          | -        | -        | -        | -        | -       | -        | -      |
| START        | -        | -        | -        | -        | -       | -        | -      |
| STAT1        | -        | -        | -        | -        | -       | -        | -      |
| STAT2        | -        | -        | -        | -        | -       | -        | -      |
| STAT3        | -        | -        | -        | -        | -       | -        | -      |
| STOP         | -        | -        | -        | -        | -       | -        | -      |
| SUZ12        | -        | -        | -        | -        | -       | -        | -      |
| TAF1         | -        | -        | -        | -        | -       | -        | -      |
| TAF7         | -        | -        | -        | -        | -       | -        | -      |
| TAL1         | -        | -        | -        | -        | -       | -        | -      |
| TBP          | -        | -        | -        | -        | -       | -        | -      |
| TCF12        | -        | -        | -        | -        | -       | -        | -      |
| TCF7L2       | -        | -        | -        | -        | -       | -        | -      |
| TFAP2A       | -        | -        | -        | -        | -       | -        | -      |
| TFAP2C       | -        | -        | -        | -        | -       | -        | -      |
| THAP1        | -        | -        | -        | -        | -       | -        | -      |
| TRAN         | -        | -        | 3        | 4        | 1       | 1        | -      |
| TRIM28       | -        | -        | -        | -        | -       | -        | -      |
| TSS          | 6        | 2        | -        | -        | 4       | 2        | 1      |
| TSS_FLANK    | -        | -        | -        | -        | -       | -        | -      |
| USF1         | -        | -        | -        | -        | -       | -        | -      |
| USF2         | 1        | -        | -        | -        | -       | -        | -      |
| UTR3         | -        | -        | -        | 1        | -       | -        | -      |
| UTR5         | 1        | -        | -        | -        | -       | -        | -      |
| WEAK_ENH     | -        | -        | -        | -        | -       | -        | -      |
| WRNIP1       | -        | -        | -        | -        | -       | -        | -      |
| XRCC4        | -        | -        | -        | -        | -       | -        | -      |
| YY1          | -        | -        | -        | -        | -       | -        | -      |
| ZBTB33       | -        | -        | -        | -        | -       | -        | -      |
| ZBTB7A       | -        | -        | -        | -        | -       | -        | -      |
| ZEB1         | -        | -        | -        | -        | -       | -        | -      |
| ZNF143       | -        | -        | -        | -        | -       | -        | -      |
| ZNF263       | -        | -        | -        | -        | -       | -        | -      |
| ZNF274       | -        | -        | -        | -        | -       | -        | -      |
| ZZZ3         | -        | -        | -        | -        | -       | -        | -      |
| bound_motifs | -        | -        | -        | -        | 1       | -        | 1      |
| cpg_island   | 1        | -        | -        | -        | 1       | -        | -      |
| dnase_fps    | 36       | -        | -        | -        | -       | -        | -      |
| in_cpg       | -        | -        | -        | 1        | -       | 1        | -      |

| SNP             | rs174574   | rs174576   | rs174577   | rs174578   | rs174580   | rs174581   | rs174583   |
|-----------------|------------|------------|------------|------------|------------|------------|------------|
| Chromosome      | 11         | 11         | 11         | 11         | 11         | 11         | 11         |
| Position        | 61,600,342 | 61,603,510 | 61,604,814 | 61,605,499 | 61,606,642 | 61,606,683 | 61,609,750 |
| Region score    | 0.3        | 0.25       | 0.28       | 0.21       | 0.24       | 0.21       | 0.34       |
| TSS score       | 0.3        | 0.19       | 0.08       | 0.14       | 0.09       | 0.07       | 0.25       |
| Unmatched score | 0.33       | 0.21       | 0.18       | 0.21       | 0.21       | 0.16       | 0.52       |
| Average GERP    | -0.92367   | -0.42546   | -0.79807   | -0.61788   | -0.77125   | -0.52703   | 0.5894     |
| Average DAF     | 0.0008     | 0.00171    | 0.00241    | 0.00161    | 0.00222    | 0.0024     | 0.00165    |
| Average het     | 0.00094    | 0.00123    | 0.00151    | 0.00119    | 0.00124    | 0.00153    | 0.00078    |
| GERP            | -0.694     | -2.97      | -0.924     | -4.83      | 0.0877     | -2.78      | -7.18      |
| %GC             | 54.5%      | 36.6%      | 48.5%      | 63.4%      | 67.3%      | 66.3%      | 62.4%      |
| TSS distance    | -3551      | -4258      | -2954      | -2269      | -1126      | -1085      | 1635       |
| SS distance     | 3669       | -1737      | -433       | 136        | -1161      | -1120      | 1550       |
| ACCEPTOR        | -          | -          | -          | -          | -          | -          | -          |
| ATF3            | -          | -          | -          | -          | -          | -          | -          |
| BATF            | -          | -          | -          | -          | -          | -          | -          |
| BCL11A          | -          | -          | -          | -          | -          | -          | -          |
| BCL3            | -          | -          | -          | -          | -          | -          | -          |
| BCLAF1          | -          | -          | -          | -          | -          | -          | -          |
| BDP1            | -          | -          | -          | -          | -          | -          | -          |
| BHLHE40         | -          | -          | -          | -          | -          | -          | -          |
| BRCA1           | -          | -          | -          | -          | -          | -          | -          |
| BRF1            | -          | -          | -          | -          | -          | -          | -          |
| BRF2            | -          | -          | -          | -          | -          | -          | -          |
| CCNT2           | -          | -          | -          | -          | -          | -          | -          |
| CDS             | -          | -          | -          | -          | -          | -          | -          |
| CEBPB           | -          | -          | -          | -          | -          | -          | -          |
| CHD2            | -          | -          | -          | -          | -          | -          | -          |
| CTBP2           | -          | -          | -          | -          | -          | -          | -          |
| CTCF            | -          | -          | -          | -          | -          | -          | -          |
| CTCF_L          | -          | -          | -          | -          | -          | -          | -          |
| CTCF_REG        | -          | -          | -          | -          | -          | -          | -          |
| DNase           | 6          | 1          | -          | 1          | -          | -          | 1          |
| DONOR           | -          | -          | -          | -          | -          | -          | -          |
| E2F1            | -          | -          | -          | -          | -          | -          | -          |
| E2F4            | -          | -          | -          | -          | -          | -          | -          |
| E2F6            | -          | -          | -          | -          | -          | -          | -          |
| EBF1            | -          | -          | -          | -          | -          | -          | -          |
| EGR1            | -          | -          | -          | -          | -          | -          | -          |
| ELF1            | -          | -          | -          | -          | -          | -          | -          |
| ELK4            | -          | -          | -          | -          | -          | -          | -          |
| ENH             | -          | 1          | 1          | -          | -          | -          | 1          |
| EP300           | -          | -          | -          | -          | -          | -          | -          |
| ERAPHA          | -          | -          | -          | -          | -          | -          | -          |
| ESRRA           | -          | -          | -          | -          | -          | -          | -          |
| ETS1            | -          | -          | -          | -          | -          | -          | -          |
| EXON            | -          | -          | -          | -          | -          | -          | -          |
| Eralphaa        | -          | -          | -          | -          | -          | -          | -          |
| FAIRE           | -          | -          | -          | -          | -          | -          | -          |
| FAM48A          | -          | -          | -          | -          | -          | -          | -          |
| FOS             | -          | -          | -          | -          | -          | -          | -          |
| FOSL1           | -          | -          | -          | -          | -          | -          | -          |
| FOSL2           | -          | -          | -          | -          | -          | -          | -          |
| FOXA1           | -          | -          | -          | -          | -          | -          | -          |
| FOXA2           | -          | -          | -          | -          | -          | -          | -          |
| GABPA           | -          | -          | -          | -          | -          | -          | -          |
| GATA1           | -          | -          | -          | -          | -          | -          | -          |
| GATA2           | -          | -          | -          | -          | -          | -          | -          |

| SNP               | rs174574 | rs174576 | rs174577 | rs174578 | rs174580 | rs174581 | rs174583 |
|-------------------|----------|----------|----------|----------|----------|----------|----------|
| GATA3             | -        | -        | -        | -        | -        | -        | -        |
| GTF2B             | -        | -        | -        | -        | -        | -        | -        |
| GTF2F1            | -        | -        | -        | -        | -        | -        | -        |
| GTF3C2            | -        | -        | -        | -        | -        | -        | -        |
| H2AFZ             | -        | -        | -        | -        | -        | -        | -        |
| H3K27ac           | 4        | 4        | 3        | 1        | 1        | 1        | 1        |
| H3K27me3          | -        | -        | -        | -        | -        | -        | -        |
| H3K36me3          | 10       | 2        | 16       | 18       | 18       | 17       | 23       |
| H3K4me1           | 9        | 7        | 3        | 3        | 2        | 2        | 2        |
| H3K4me2           | 5        | 4        | -        | -        | -        | -        | 1        |
| H3K4me3           | 7        | 3        | -        | -        | -        | -        | 1        |
| H3K79me2          | 2        | 2        | 2        | 2        | -        | -        | -        |
| H3K9ac            | 3        | 3        | 1        | 1        | 1        | 1        | 2        |
| H3K9me1           | -        | -        | -        | -        | -        | -        | -        |
| H3K9me3           | -        | -        | -        | -        | -        | -        | -        |
| H4K20me1          | 3        | -        | -        | -        | -        | -        | -        |
| HDAC2             | -        | -        | -        | -        | -        | -        | -        |
| HDAC8             | -        | -        | -        | -        | -        | -        | -        |
| HEY1              | -        | -        | -        | -        | -        | -        | -        |
| HMGN3             | -        | -        | -        | -        | -        | -        | -        |
| HNF4A             | -        | -        | -        | -        | -        | -        | -        |
| HNF4G             | -        | -        | -        | -        | -        | -        | -        |
| HSF1              | -        | -        | -        | -        | -        | -        | -        |
| INTRON            | 1        | 1        | 1        | 1        | 1        | 1        | 1        |
| IRF1              | -        | -        | -        | -        | -        | -        | -        |
| IRF3              | -        | -        | -        | -        | -        | -        | -        |
| IRF4              | -        | -        | -        | -        | -        | -        | -        |
| JUN               | -        | -        | -        | -        | -        | -        | -        |
| JUNB              | -        | -        | -        | -        | -        | -        | -        |
| JUND              | -        | -        | -        | -        | -        | -        | -        |
| KAT2A             | -        | -        | -        | -        | -        | -        | -        |
| MAFF              | -        | -        | -        | -        | -        | -        | -        |
| MAFK              | -        | -        | -        | -        | -        | -        | -        |
| MAX               | -        | -        | -        | -        | -        | -        | -        |
| MEF2A             | -        | -        | -        | -        | -        | -        | -        |
| MEF2_complex      | -        | -        | -        | -        | -        | -        | -        |
| MXI1              | -        | -        | -        | -        | -        | -        | -        |
| MYC               | -        | -        | -        | -        | -        | -        | -        |
| NANOG             | -        | -        | -        | -        | -        | -        | -        |
| NFE2              | -        | -        | -        | -        | -        | -        | -        |
| NFKB1             | -        | -        | -        | -        | -        | -        | -        |
| NFYA              | -        | -        | -        | -        | -        | -        | -        |
| NFYB              | -        | -        | -        | -        | -        | -        | -        |
| NR2C2             | -        | -        | -        | -        | -        | -        | -        |
| NR3C1             | -        | -        | -        | -        | -        | -        | -        |
| NR4A1             | -        | -        | -        | -        | -        | -        | -        |
| NRF1              | -        | -        | -        | -        | -        | -        | -        |
| PAX5              | -        | -        | -        | -        | -        | -        | -        |
| PBX3              | -        | -        | -        | -        | -        | -        | -        |
| POLR2A            | 1        | -        | -        | -        | -        | -        | 1        |
| POLR2A_elongating | -        | -        | -        | -        | -        | -        | -        |
| POLR3A            | -        | -        | -        | -        | -        | -        | -        |
| POU2F2            | -        | -        | -        | -        | -        | -        | -        |
| POU5F1            | -        | -        | -        | -        | -        | -        | -        |
| PPARGC1A          | -        | -        | -        | -        | -        | -        | -        |
| PRDM1             | -        | -        | -        | -        | -        | -        | -        |
| RAD21             | -        | -        | -        | -        | -        | -        | -        |
| RDBP              | -        | -        | -        | -        | -        | -        | -        |

| SNP          | rs174574 | rs174576 | rs174577 | rs174578 | rs174580 | rs174581 | rs174583 |
|--------------|----------|----------|----------|----------|----------|----------|----------|
| REP          | -        | 1        | 1        | -        | -        | -        | -        |
| REST         | -        | -        | -        | -        | -        | -        | -        |
| RFX5         | -        | -        | -        | -        | -        | -        | -        |
| RXRA         | -        | -        | -        | -        | -        | -        | -        |
| SETDB1       | -        | -        | -        | -        | -        | -        | -        |
| SIN3A        | -        | -        | -        | -        | -        | -        | -        |
| SIRT6        | -        | -        | -        | -        | -        | -        | -        |
| SIX5         | -        | -        | -        | -        | -        | -        | -        |
| SLC22A2      | -        | -        | -        | -        | -        | -        | -        |
| SMARCA4      | -        | -        | -        | -        | -        | -        | -        |
| SMARCB1      | -        | -        | -        | -        | -        | -        | -        |
| SMARCC1      | -        | -        | -        | -        | -        | -        | -        |
| SMARCC2      | -        | -        | -        | -        | -        | -        | -        |
| SMC3         | -        | -        | -        | -        | -        | -        | -        |
| SP1          | -        | -        | -        | -        | -        | -        | -        |
| SP2          | -        | -        | -        | -        | -        | -        | -        |
| SPI1         | -        | -        | -        | -        | -        | -        | -        |
| SREBF1       | -        | -        | -        | -        | -        | -        | -        |
| SREBF2       | -        | -        | -        | -        | -        | -        | -        |
| SRF          | -        | -        | -        | -        | -        | -        | -        |
| START        | -        | -        | -        | -        | -        | -        | -        |
| STAT1        | -        | -        | -        | 1        | -        | -        | -        |
| STAT2        | -        | -        | -        | 1        | -        | -        | -        |
| STAT3        | -        | -        | -        | -        | -        | -        | -        |
| STOP         | -        | -        | -        | -        | -        | -        | -        |
| SUZ12        | -        | -        | -        | -        | -        | -        | -        |
| TAF1         | -        | -        | -        | -        | -        | -        | -        |
| TAF7         | -        | -        | -        | -        | -        | -        | -        |
| TAL1         | -        | -        | -        | -        | -        | -        | -        |
| TBP          | -        | -        | -        | -        | -        | -        | -        |
| TCF12        | -        | -        | -        | -        | -        | -        | -        |
| TCF7L2       | -        | -        | -        | -        | -        | -        | -        |
| TFAP2A       | -        | -        | -        | -        | -        | -        | -        |
| TFAP2C       | -        | -        | -        | -        | -        | -        | -        |
| THAP1        | -        | -        | -        | -        | -        | -        | -        |
| TRAN         | 4        | 2        | 3        | 4        | 5        | 5        | 5        |
| TRIM28       | -        | -        | -        | -        | -        | -        | -        |
| TSS          | -        | -        | -        | -        | -        | -        | -        |
| TSS_FLANK    | -        | -        | -        | -        | -        | -        | -        |
| USF1         | -        | -        | -        | -        | -        | -        | -        |
| USF2         | -        | -        | -        | -        | -        | -        | -        |
| UTR3         | -        | -        | -        | -        | -        | -        | -        |
| UTR5         | -        | -        | -        | -        | -        | -        | -        |
| WEAK_ENH     | -        | -        | -        | -        | -        | -        | -        |
| WRNIP1       | -        | -        | -        | -        | -        | -        | -        |
| XRCC4        | -        | -        | -        | -        | -        | -        | -        |
| YY1          | -        | -        | -        | -        | -        | -        | -        |
| ZBTB33       | -        | -        | -        | -        | -        | -        | -        |
| ZBTB7A       | -        | -        | -        | -        | -        | -        | -        |
| ZEB1         | -        | -        | -        | -        | -        | -        | -        |
| ZNF143       | -        | -        | -        | -        | -        | -        | -        |
| ZNF263       | -        | -        | -        | -        | -        | -        | -        |
| ZNF274       | -        | -        | -        | -        | -        | -        | -        |
| ZZZ3         | -        | -        | -        | -        | -        | -        | -        |
| bound_motifs | -        | -        | -        | -        | -        | -        | -        |
| cpg_island   | -        | -        | -        | -        | -        | -        | -        |
| dnase_fps    | 1        | -        | -        | -        | -        | -        | -        |
| in_cpg       | -        | -        | -        | -        | -        | 1        | 1        |

| SNP             | rs174584   | rs174592   | rs174594   | rs7264355  | rs174598   | rs174599   | rs174600   |
|-----------------|------------|------------|------------|------------|------------|------------|------------|
| Chromosome      | 11         | 11         | 11         | 11         | 11         | 11         | 11         |
| Position        | 61,610,750 | 61,618,608 | 61,619,829 | 61,620,274 | 61,621,194 | 61,621,556 | 61,622,227 |
| Region score    | 0.31       | 0.15       | 0.26       | 0.24       | 0.28       | 0.33       | 0.24       |
| TSS score       | 0.09       | 0.03       | 0.06       | 0.02       | 0.05       | 0.09       | 0.12       |
| Unmatched score | 0.12       | 0.13       | 0.11       | 0.05       | 0.18       | 0.27       | 0.42       |
| Average GERP    | 0.05419    | -0.27793   | -0.22341   | -0.06186   | -1.53303   | -0.20373   | -0.91887   |
| Average DAF     | 0.00076    | 0.00186    | 0.00083    | 0.00259    | 0.0045     | 0.00198    | 0.0026     |
| Average het     | 0.00081    | 0.00105    | 0.00116    | 0.00237    | 0.00287    | 0.00133    | 0.00082    |
| GERP            | 0.235      | -0.897     | 0.546      | -0.0767    | -6.27      | 2.34       | 0.888      |
| %GC             | 52.5%      | 40.6%      | 60.4%      | 39.6%      | 63.4%      | 67.3%      | 58.4%      |
| TSS distance    | 2635       | 2971       | -1829      | -1384      | -464       | -102       | 567        |
| SS distance     | 2550       | 1387       | 2608       | 3053       | -3286      | -2924      | -2253      |
| ACCEPTOR        | -          | -          | -          | -          | -          | -          | -          |
| ATF3            | -          | -          | -          | -          | -          | -          | -          |
| BATF            | -          | -          | -          | -          | -          | -          | -          |
| BCL11A          | -          | -          | -          | -          | -          | -          | -          |
| BCL3            | -          | -          | -          | -          | -          | -          | -          |
| BCLAF1          | -          | -          | -          | -          | -          | -          | -          |
| BDP1            | -          | -          | -          | -          | -          | -          | -          |
| BHLHE40         | -          | -          | -          | -          | -          | -          | -          |
| BRCA1           | -          | -          | -          | -          | -          | -          | -          |
| BRF1            | -          | -          | -          | -          | -          | -          | -          |
| BRF2            | -          | -          | -          | -          | -          | -          | -          |
| CCNT2           | -          | -          | -          | -          | -          | -          | -          |
| CDS             | -          | -          | -          | -          | -          | -          | -          |
| CEBPB           | -          | -          | -          | -          | -          | -          | -          |
| CHD2            | -          | -          | -          | -          | -          | -          | -          |
| CTBP2           | -          | -          | -          | -          | -          | -          | -          |
| CTCF            | -          | -          | -          | -          | -          | -          | -          |
| CTCF_L          | -          | -          | -          | -          | -          | -          | -          |
| CTCF_REG        | -          | -          | -          | -          | -          | -          | -          |
| DNase           | -          | 2          | 1          | -          | -          | 1          | 1          |
| DONOR           | -          | -          | -          | -          | -          | -          | -          |
| E2F1            | -          | -          | -          | -          | -          | -          | -          |
| E2F4            | -          | -          | -          | -          | -          | -          | -          |
| E2F6            | -          | -          | -          | -          | -          | -          | -          |
| EBF1            | -          | -          | -          | -          | -          | -          | -          |
| EGR1            | -          | -          | -          | -          | -          | -          | -          |
| ELF1            | -          | -          | -          | -          | -          | -          | -          |
| ELK4            | -          | -          | -          | -          | -          | -          | -          |
| ENH             | -          | -          | -          | -          | -          | -          | -          |
| EP300           | -          | -          | -          | -          | -          | -          | -          |
| ERALPHAA        | -          | -          | -          | -          | -          | -          | -          |
| ESRRA           | -          | -          | -          | -          | -          | -          | -          |
| ETS1            | -          | -          | -          | -          | -          | -          | -          |
| EXON            | -          | -          | -          | -          | -          | -          | 1          |
| Eralphaa        | -          | -          | -          | -          | -          | -          | -          |
| FAIRE           | -          | -          | -          | -          | 1          | -          | -          |
| FAM48A          | -          | -          | -          | -          | -          | -          | -          |
| FOS             | -          | -          | -          | -          | -          | -          | -          |
| FOSL1           | -          | -          | -          | -          | -          | -          | -          |
| FOSL2           | -          | -          | -          | -          | -          | -          | -          |
| FOXA1           | -          | -          | -          | -          | -          | -          | -          |
| FOXA2           | -          | -          | -          | -          | -          | -          | -          |
| GABPA           | -          | -          | -          | -          | -          | -          | -          |
| GATA1           | -          | -          | -          | -          | -          | -          | -          |
| GATA2           | -          | -          | -          | -          | -          | -          | -          |

| SNP               | rs174584 | rs174592 | rs174594 | rs7264355 | rs174598 | rs174599 | rs174600 |
|-------------------|----------|----------|----------|-----------|----------|----------|----------|
| GATA3             | -        | -        | -        | -         | -        | -        | -        |
| GTF2B             | -        | -        | -        | -         | -        | -        | -        |
| GTF2F1            | -        | -        | -        | -         | -        | -        | -        |
| GTF3C2            | -        | -        | -        | -         | -        | -        | -        |
| H2AFZ             | -        | -        | -        | -         | -        | -        | -        |
| H3K27ac           | 1        | 1        | -        | -         | 1        | 2        | 2        |
| H3K27me3          | -        | -        | -        | -         | -        | -        | -        |
| H3K36me3          | 22       | 16       | 14       | 5         | 17       | 17       | 17       |
| H3K4me1           | 2        | 2        | 2        | 1         | 2        | 2        | 2        |
| H3K4me2           | -        | -        | -        | -         | -        | -        | -        |
| H3K4me3           | -        | -        | -        | -         | -        | -        | -        |
| H3K79me2          | -        | -        | -        | -         | -        | -        | -        |
| H3K9ac            | 2        | 1        | 1        | -         | 1        | 1        | 1        |
| H3K9me1           | -        | -        | -        | -         | -        | -        | -        |
| H3K9me3           | -        | -        | -        | -         | -        | -        | -        |
| H4K20me1          | -        | -        | -        | -         | -        | -        | -        |
| HDAC2             | -        | -        | -        | -         | -        | -        | -        |
| HDAC8             | -        | -        | -        | -         | -        | -        | -        |
| HEY1              | -        | -        | -        | -         | -        | -        | -        |
| HMGN3             | -        | -        | -        | -         | -        | -        | -        |
| HNF4A             | -        | -        | -        | -         | -        | -        | -        |
| HNF4G             | -        | -        | -        | -         | -        | -        | -        |
| HSF1              | -        | -        | -        | -         | -        | -        | -        |
| INTRON            | 1        | 1        | 1        | 1         | 1        | 1        | 1        |
| IRF1              | -        | -        | -        | -         | -        | -        | -        |
| IRF3              | -        | -        | -        | -         | -        | -        | -        |
| IRF4              | -        | -        | -        | -         | -        | -        | -        |
| JUN               | -        | -        | -        | -         | -        | -        | -        |
| JUNB              | -        | -        | -        | -         | -        | -        | -        |
| JUND              | -        | -        | -        | -         | -        | -        | -        |
| KAT2A             | -        | -        | -        | -         | -        | -        | -        |
| MAFF              | -        | -        | -        | -         | -        | -        | -        |
| MAFK              | -        | -        | -        | -         | -        | -        | -        |
| MAX               | -        | -        | -        | -         | -        | -        | -        |
| MEF2A             | -        | -        | -        | -         | -        | -        | -        |
| MEF2_complex      | -        | -        | -        | -         | -        | -        | -        |
| MXI1              | -        | -        | -        | -         | -        | -        | -        |
| MYC               | -        | -        | -        | -         | -        | -        | -        |
| NANOG             | -        | -        | -        | -         | -        | -        | -        |
| NFE2              | -        | -        | -        | -         | -        | -        | -        |
| NFKB1             | -        | -        | -        | -         | -        | -        | -        |
| NFYA              | -        | -        | -        | -         | -        | -        | -        |
| NFYB              | -        | -        | -        | -         | -        | -        | -        |
| NR2C2             | -        | -        | -        | -         | -        | -        | -        |
| NR3C1             | -        | -        | -        | -         | -        | -        | -        |
| NR4A1             | -        | -        | -        | -         | -        | -        | -        |
| NRF1              | -        | -        | -        | -         | -        | -        | -        |
| PAX5              | -        | -        | -        | -         | -        | -        | -        |
| PBX3              | -        | -        | -        | -         | -        | -        | -        |
| POLR2A            | -        | -        | -        | -         | -        | -        | 2        |
| POLR2A_elongating | -        | -        | -        | -         | -        | -        | -        |
| POLR3A            | -        | -        | -        | -         | -        | -        | -        |
| POU2F2            | -        | -        | -        | -         | -        | -        | -        |
| POU5F1            | -        | -        | -        | -         | -        | -        | -        |
| PPARGC1A          | -        | -        | -        | -         | -        | -        | -        |
| PRDM1             | -        | -        | -        | -         | -        | -        | -        |
| RAD21             | -        | -        | -        | -         | -        | -        | -        |
| RDBP              | -        | -        | -        | -         | -        | -        | -        |

| SNP          | rs174584 | rs174592 | rs174594 | rs7264355 | rs174598 | rs174599 | rs174600 |
|--------------|----------|----------|----------|-----------|----------|----------|----------|
| REP          | -        | -        | 1        | 1         | -        | -        | -        |
| REST         | -        | -        | -        | -         | -        | -        | -        |
| RFX5         | -        | -        | -        | -         | -        | -        | -        |
| RXRA         | -        | -        | -        | -         | -        | -        | -        |
| SETDB1       | -        | -        | -        | -         | -        | -        | -        |
| SIN3A        | -        | -        | -        | -         | -        | -        | -        |
| SIRT6        | -        | -        | -        | -         | -        | -        | -        |
| SIX5         | -        | -        | -        | -         | -        | -        | -        |
| SLC22A2      | -        | -        | -        | -         | -        | -        | -        |
| SMARCA4      | -        | -        | -        | -         | -        | -        | -        |
| SMARCB1      | -        | -        | -        | -         | -        | -        | -        |
| SMARCC1      | -        | -        | -        | -         | -        | -        | -        |
| SMARCC2      | -        | -        | -        | -         | -        | -        | -        |
| SMC3         | -        | -        | -        | -         | -        | -        | -        |
| SP1          | -        | -        | -        | -         | -        | -        | -        |
| SP2          | -        | -        | -        | -         | -        | -        | -        |
| SPI1         | -        | -        | -        | -         | -        | -        | -        |
| SREBF1       | -        | -        | -        | -         | -        | -        | -        |
| SREBF2       | -        | -        | -        | -         | -        | -        | -        |
| SRF          | -        | -        | -        | -         | -        | -        | -        |
| START        | -        | -        | -        | -         | -        | -        | -        |
| STAT1        | -        | -        | -        | -         | -        | -        | -        |
| STAT2        | -        | -        | -        | -         | -        | -        | -        |
| STAT3        | -        | -        | -        | -         | -        | -        | -        |
| STOP         | -        | -        | -        | -         | -        | -        | -        |
| SUZ12        | -        | -        | -        | -         | -        | -        | -        |
| TAF1         | -        | -        | -        | -         | -        | -        | -        |
| TAF7         | -        | -        | -        | -         | -        | -        | -        |
| TAL1         | -        | -        | -        | -         | -        | -        | -        |
| TBP          | -        | -        | -        | -         | -        | -        | -        |
| TCF12        | -        | -        | -        | -         | -        | -        | -        |
| TCF7L2       | -        | -        | -        | -         | -        | -        | -        |
| TFAP2A       | -        | -        | -        | -         | -        | -        | -        |
| TFAP2C       | -        | -        | -        | -         | -        | -        | -        |
| THAP1        | -        | -        | -        | -         | -        | -        | -        |
| TRAN         | 5        | 6        | 4        | 5         | 4        | 5        | 5        |
| TRIM28       | -        | -        | -        | -         | -        | -        | -        |
| TSS          | -        | -        | -        | -         | -        | -        | -        |
| TSS_FLANK    | -        | -        | -        | -         | -        | -        | -        |
| USF1         | -        | -        | -        | -         | -        | -        | -        |
| USF2         | -        | -        | -        | -         | -        | -        | -        |
| UTR3         | -        | -        | -        | -         | -        | -        | -        |
| UTR5         | -        | -        | -        | -         | -        | -        | -        |
| WEAK_ENH     | -        | -        | -        | -         | -        | -        | -        |
| WRNIP1       | -        | -        | -        | -         | -        | -        | -        |
| XRCC4        | -        | -        | -        | -         | -        | -        | -        |
| YY1          | -        | -        | -        | -         | -        | -        | -        |
| ZBTB33       | -        | -        | -        | -         | -        | -        | -        |
| ZBTB7A       | -        | -        | -        | -         | -        | -        | -        |
| ZEB1         | -        | -        | -        | -         | -        | -        | -        |
| ZNF143       | -        | -        | -        | -         | -        | -        | -        |
| ZNF263       | -        | -        | -        | -         | -        | -        | -        |
| ZNF274       | -        | -        | -        | -         | -        | -        | -        |
| ZZZ3         | -        | -        | -        | -         | -        | -        | -        |
| bound_motifs | -        | -        | -        | -         | 1        | -        | -        |
| cpg_island   | -        | -        | -        | -         | -        | -        | -        |
| dnase_fps    | -        | -        | -        | -         | -        | -        | -        |
| in_cpg       | -        | -        | -        | -         | 1        | -        | -        |

| SNP             | rs174601   | rs97384    |
|-----------------|------------|------------|
| Chromosome      | 11         | 11         |
| Position        | 61,623,140 | 61,624,181 |
| Region score    | 0.3        | 0.16       |
| TSS score       | 0.14       | 0.16       |
| Unmatched score | 0.42       | 0.37       |
| Average GERP    | -0.9696    | -0.76994   |
| Average DAF     | 0.00067    | 0.00125    |
| Average het     | 0.00081    | 0.00134    |
| GERP            | -6.31      | -2.12      |
| %GC             | 60.4%      | 57.4%      |
| TSS distance    | 1480       | 2521       |
| SS distance     | -1340      | -299       |
| ACCEPTOR        | -          | -          |
| ATF3            | -          | -          |
| BATF            | -          | -          |
| BCL11A          | -          | -          |
| BCL3            | -          | -          |
| BCLAF1          | -          | -          |
| BDP1            | -          | -          |
| BHLHE40         | -          | -          |
| BRCA1           | -          | -          |
| BRF1            | -          | -          |
| BRF2            | -          | -          |
| CCNT2           | -          | -          |
| CDS             | -          | -          |
| CEBPB           | -          | -          |
| CHD2            | -          | -          |
| CTBP2           | -          | -          |
| CTCF            | -          | -          |
| CTCF_L          | -          | -          |
| CTCF_REG        | -          | -          |
| DNase           | -          | -          |
| DONOR           | -          | -          |
| E2F1            | -          | -          |
| E2F4            | -          | -          |
| E2F6            | -          | -          |
| EBF1            | -          | -          |
| EGR1            | -          | -          |
| ELF1            | -          | -          |
| ELK4            | -          | -          |
| ENH             | -          | -          |
| EP300           | -          | -          |
| ERAPHA          | -          | -          |
| ESRR            | -          | -          |
| ETS1            | -          | -          |
| EXON            | 1          | 1          |
| Eralpha         | -          | -          |
| FAIRE           | 1          | 2          |
| FAM48A          | -          | -          |
| FOS             | -          | -          |
| FOSL1           | -          | -          |
| FOSL2           | -          | -          |
| FOXA1           | -          | -          |
| FOXA2           | -          | -          |
| GABPA           | -          | -          |
| GATA1           | -          | -          |
| GATA2           | -          | -          |



| SNP               | rs174601 | rs97384 |
|-------------------|----------|---------|
| GATA3             | -        | -       |
| GTF2B             | -        | -       |
| GTF2F1            | -        | -       |
| GTF3C2            | -        | -       |
| H2AFZ             | -        | -       |
| H3K27ac           | 1        | -       |
| H3K27me3          | -        | -       |
| H3K36me3          | 16       | 17      |
| H3K4me1           | 2        | 1       |
| H3K4me2           | -        | -       |
| H3K4me3           | -        | -       |
| H3K79me2          | -        | -       |
| H3K9ac            | 1        | 1       |
| H3K9me1           | -        | -       |
| H3K9me3           | -        | -       |
| H4K20me1          | -        | -       |
| HDAC2             | -        | -       |
| HDAC8             | -        | -       |
| HEY1              | -        | -       |
| HMGN3             | -        | -       |
| HNF4A             | -        | -       |
| HNF4G             | -        | -       |
| HSF1              | -        | -       |
| INTRON            | 1        | 1       |
| IRF1              | -        | -       |
| IRF3              | -        | -       |
| IRF4              | -        | -       |
| JUN               | -        | -       |
| JUNB              | -        | -       |
| JUND              | -        | -       |
| KAT2A             | -        | -       |
| MAFF              | -        | -       |
| MAFK              | -        | -       |
| MAX               | -        | -       |
| MEF2A             | -        | -       |
| MEF2_complex      | -        | -       |
| MXI1              | -        | -       |
| MYC               | -        | -       |
| NANOG             | -        | -       |
| NFE2              | -        | -       |
| NFKB1             | -        | -       |
| NFYA              | -        | -       |
| NFYB              | -        | -       |
| NR2C2             | -        | -       |
| NR3C1             | -        | -       |
| NR4A1             | -        | -       |
| NRF1              | -        | -       |
| PAX5              | -        | -       |
| PBX3              | -        | -       |
| POLR2A            | -        | 1       |
| POLR2A_elongating | -        | -       |
| POLR3A            | -        | -       |
| POU2F2            | -        | -       |
| POU5F1            | -        | -       |
| PPARGC1A          | -        | -       |
| PRDM1             | -        | -       |
| RAD21             | -        | -       |
| RDBP              | -        | -       |

| SNP          | rs174601 | rs97384 |
|--------------|----------|---------|
| REP          | 1        | -       |
| REST         | -        | -       |
| RFX5         | -        | -       |
| RXRA         | -        | -       |
| SETDB1       | -        | -       |
| SIN3A        | -        | -       |
| SIRT6        | -        | -       |
| SIX5         | -        | -       |
| SLC22A2      | -        | -       |
| SMARCA4      | -        | -       |
| SMARCB1      | -        | -       |
| SMARCC1      | -        | -       |
| SMARCC2      | -        | -       |
| SMC3         | -        | -       |
| SP1          | -        | -       |
| SP2          | -        | -       |
| SPI1         | -        | -       |
| SREBF1       | -        | -       |
| SREBF2       | -        | -       |
| SRF          | -        | -       |
| START        | -        | -       |
| STAT1        | -        | -       |
| STAT2        | -        | -       |
| STAT3        | -        | -       |
| STOP         | -        | -       |
| SUZ12        | -        | -       |
| TAF1         | -        | -       |
| TAF7         | -        | -       |
| TAL1         | -        | -       |
| TBP          | -        | -       |
| TCF12        | -        | -       |
| TCF7L2       | -        | -       |
| TFAP2A       | -        | -       |
| TFAP2C       | -        | -       |
| THAP1        | -        | -       |
| TRAN         | 4        | 4       |
| TRIM28       | -        | -       |
| TSS          | -        | -       |
| TSS_FLANK    | -        | -       |
| USF1         | -        | -       |
| USF2         | -        | -       |
| UTR3         | -        | -       |
| UTR5         | -        | -       |
| WEAK_ENH     | -        | -       |
| WRNIP1       | -        | -       |
| XRCC4        | -        | -       |
| YY1          | -        | -       |
| ZBTB33       | -        | -       |
| ZBTB7A       | -        | -       |
| ZEB1         | -        | -       |
| ZNF143       | -        | -       |
| ZNF263       | -        | -       |
| ZNF274       | -        | -       |
| ZZZ3         | -        | -       |
| bound_motifs | -        | -       |
| cpg_island   | -        | -       |
| dnase_fps    | -        | -       |
| in_cpg       | -        | -       |

**Table S4. Association of rs174576 with nearby gene expression in Brain xQTL dataset.**

| SNP             | SNPc      | SNPpos          | featureName    | feature   | featurePositic  | SpearmanR         | pValue          |
|-----------------|-----------|-----------------|----------------|-----------|-----------------|-------------------|-----------------|
| rs174576        | 11        | 61603510        | CCDC86         | 11        | 60617796        | 0.10761057        | 0.016727        |
| rs174576        | 11        | 61603510        | PTGDR2         | 11        | 60621196        | 0.00937032        | 0.83543         |
| rs174576        | 11        | 61603510        | PRPF19         | 11        | 60670345        | -0.0271187        | 0.547623        |
| rs174576        | 11        | 61603510        | TMEM109        | 11        | 60690216        | 0.02598794        | 0.56445         |
| rs174576        | 11        | 61603510        | TMEM132A       | 11        | 60704249        | 0.03245677        | 0.471679        |
| rs174576        | 11        | 61603510        | SLC15A3        | 11        | 60718625        | -0.0001759        | 0.996888        |
| rs174576        | 11        | 61603510        | VPS37C         | 11        | 60905668        | 0.07971639        | 0.076708        |
| rs174576        | 11        | 61603510        | VWCE           | 11        | 61053735        | 0.00086987        | 0.984614        |
| rs174576        | 11        | 61603510        | DDB1           | 11        | 61100441        | 0.00978811        | 0.828204        |
| rs174576        | 11        | 61603510        | DAK            | 11        | 61113329        | 0.01122774        | 0.803419        |
| rs174576        | 11        | 61603510        | CYB561A3       | 11        | 61124740        | 0.01509886        | 0.737808        |
| rs174576        | 11        | 61603510        | TMEM138        | 11        | 61136244        | -0.0389197        | 0.388045        |
| rs174576        | 11        | 61603510        | TMEM216        | 11        | 61161356        | 0.01189519        | 0.791993        |
| rs174576        | 11        | 61603510        | CPSF7          | 11        | 61188867        | -0.0211698        | 0.638795        |
| rs174576        | 11        | 61603510        | SDHAF2         | 11        | 61213417        | -0.0422312        | 0.348925        |
| rs174576        | 11        | 61603510        | PPP1R32        | 11        | 61258286        | -0.0125515        | 0.780801        |
| rs174576        | 11        | 61603510        | LRRRC10B       | 11        | 61277347        | 0.02547579        | 0.572152        |
| rs174576        | 11        | 61603510        | SYT7           | 11        | 61348293        | -0.1005008        | 0.0255          |
| rs174576        | 11        | 61603510        | DAGLA          | 11        | 61511004        | 0.06900632        | 0.125601        |
| rs174576        | 11        | 61603510        | AP002380.1     | 11        | 61534985        | -0.0371227        | 0.410345        |
| rs174576        | 11        | 61603510        | MYRF           | 11        | 61551323        | -0.1065796        | 0.017807        |
| <b>rs174576</b> | <b>11</b> | <b>61603510</b> | <b>TMEM258</b> | <b>11</b> | <b>61557569</b> | <b>-0.322616</b>  | <b>1.99E-13</b> |
| rs174576        | 11        | 61603510        | FEN1           | 11        | 61564397        | 0.02951914        | 0.512741        |
| <b>rs174576</b> | <b>11</b> | <b>61603510</b> | <b>FADS1</b>   | <b>11</b> | <b>61581811</b> | <b>0.32852334</b> | <b>6.77E-14</b> |
| rs174576        | 11        | 61603510        | FADS2          | 11        | 61632624        | 0.02031105        | 0.652466        |
| rs174576        | 11        | 61603510        | FADS3          | 11        | 61657685        | -0.1119994        | 0.012744        |
| rs174576        | 11        | 61603510        | RAB3IL1        | 11        | 61687665        | -0.0334547        | 0.458153        |
| rs174576        | 11        | 61603510        | BEST1          | 11        | 61729729        | -0.0084106        | 0.85208         |
| rs174576        | 11        | 61603510        | FTH1           | 11        | 61732892        | 0.07827048        | 0.082227        |
| rs174576        | 11        | 61603510        | INCENP         | 11        | 61920145        | 0.02385279        | 0.596884        |
| rs174576        | 11        | 61603510        | ASRGL1         | 11        | 62159551        | 0.03690153        | 0.413141        |
| rs174576        | 11        | 61603510        | AHNAK          | 11        | 62303711        | -0.0312475        | 0.488359        |
| rs174576        | 11        | 61603510        | EEF1G          | 11        | 62338474        | 0.02784405        | 0.53696         |
| rs174576        | 11        | 61603510        | TUT1           | 11        | 62348964        | 0.03791928        | 0.400367        |
| rs174576        | 11        | 61603510        | MTA2           | 11        | 62365761        | -0.0468323        | 0.298882        |
| rs174576        | 11        | 61603510        | EML3           | 11        | 62379004        | 0.03023333        | 0.50259         |
| rs174576        | 11        | 61603510        | ROM1           | 11        | 62381730        | -0.0077876        | 0.862924        |
| rs174576        | 11        | 61603510        | B3GAT3         | 11        | 62389420        | 0.05523804        | 0.220367        |
| rs174576        | 11        | 61603510        | GANAB          | 11        | 62402368        | 0.03704176        | 0.411367        |
| rs174576        | 11        | 61603510        | INTS5          | 11        | 62414320        | 0.01370964        | 0.761163        |
| rs174576        | 11        | 61603510        | C11orf98       | 11        | 62437504        | 0.02475963        | 0.583005        |
| rs174576        | 11        | 61603510        | UQCC3          | 11        | 62439584        | -0.0081654        | 0.856345        |
| rs174576        | 11        | 61603510        | UBXN1          | 11        | 62445916        | -0.0459113        | 0.308497        |
| rs174576        | 11        | 61603510        | RP11-831H9.1   | 11        | 62457747        | 0.02958276        | 0.511832        |
| rs174576        | 11        | 61603510        | BSCL2          | 11        | 62474668        | 0.02226496        | 0.621538        |
| rs174576        | 11        | 61603510        | GNG3           | 11        | 62476276        | 0.07766802        | 0.084619        |
| rs174576        | 11        | 61603510        | HNRNPUL2       | 11        | 62490336        | 0.01393308        | 0.757391        |
| rs174576        | 11        | 61603510        | TTC9C          | 11        | 62507448        | 0.05301661        | 0.239517        |
| rs174576        | 11        | 61603510        | ZBTB3          | 11        | 62521137        | -0.0006525        | 0.988458        |
| rs174576        | 11        | 61603510        | POLR2G         | 11        | 62533966        | -0.0193672        | 0.667626        |
| rs174576        | 11        | 61603510        | TAF6L          | 11        | 62549585        | -2.13E-06         | 0.999962        |
| rs174576        | 11        | 61603510        | TMEM179B       | 11        | 62557179        | 0.01506211        | 0.738423        |

|          |    |          |         |    |          |            |          |
|----------|----|----------|---------|----|----------|------------|----------|
| rs174576 | 11 | 61603510 | TMEM223 | 11 | 62557443 | -6.30E-05  | 0.998886 |
| rs174576 | 11 | 61603510 | NXF1    | 11 | 62571022 | -0.0063242 | 0.888495 |
| rs174576 | 11 | 61603510 | STX5    | 11 | 62595049 | 0.00632659 | 0.888454 |

**Table S5. Association of rs174576 with nearby gene expression in the frontal cortex of GTEx dataset.**

| <b>Gene Symbol</b>  | <b>Gencode ID</b>         | <b>NES</b>   | <b>T-statistic</b> | <b>P-Value</b>  |
|---------------------|---------------------------|--------------|--------------------|-----------------|
| <i>SYT7</i>         | ENSG00000011347.5         | -0.027       | -0.62              | 0.54            |
| <i>DAGLA</i>        | ENSG00000134780.5         | -0.071       | -1.8               | 0.071           |
| <i>MYRF</i>         | ENSG00000124920.9         | -0.06        | -0.94              | 0.35            |
| <i>FEN1</i>         | ENSG00000168496.3         | 0.011        | 0.2                | 0.84            |
| <i>TMEM258</i>      | ENSG00000134825.9         | 0.085        | 1.2                | 0.22            |
| <b><i>FADS1</i></b> | <b>ENSG00000149485.12</b> | <b>-0.26</b> | <b>-4.5</b>        | <b>0.000016</b> |
| <i>FADS2</i>        | ENSG00000134824.9         | 0.073        | 0.98               | 0.33            |
| <i>FADS3</i>        | ENSG00000221968.4         | 0.0038       | 0.07               | 0.94            |
| <i>RAB3IL1</i>      | ENSG00000167994.7         | -0.0026      | -0.042             | 0.97            |
| <i>BEST1</i>        | ENSG00000167995.11        | -0.06        | -0.89              | 0.38            |
| <i>FTH1</i>         | ENSG00000167996.11        | -0.051       | -0.52              | 0.61            |
| <i>INCENP</i>       | ENSG00000149503.8         | 0.13         | 2.5                | 0.014           |

**Table S6. Association of the 21 SNPs with major depressive disorder in Han Chinese using data from the published CONVERGE MDD GWAS.**

| CHR | SNP         | POS       | Nearest Gene     | Allele | BPD analysis |                  | CONVERGE MDD GWAS |                  |
|-----|-------------|-----------|------------------|--------|--------------|------------------|-------------------|------------------|
|     |             |           |                  |        | OR           | 2-tailed P-value | OR                | 2-tailed P-value |
| 2   | rs17183814  | 166152389 | <i>SCN2A</i>     | G/A    | 1.142        | 2.02E-09         | 1.116             | <b>0.00875</b>   |
| 3   | rs2302417   | 52814256  | <i>ITIH3</i>     | T/A    | 1.076        | 6.59E-11         | 1.022             | 0.561            |
| 3   | rs3804640   | 107793709 | <i>CD47</i>      | A/G    | 1.065        | 1.99E-08         | 1.032             | 0.415            |
| 4   | rs11724116  | 162294038 | <i>FSTL5</i>     | C/T    | 1.088        | 2.37E-08         | 0.925             | 0.0644           |
| 6   | rs10455979  | 166995260 | <i>RPS6KA2</i>   | G/C    | 1.064        | 4.31E-08         | 1.010             | 0.626            |
| 7   | rs4236274   | 1896413   | <i>MAD1L1</i>    | A/G    | 1.149        | 8.49E-12         | 1.003             | 0.859            |
| 7   | rs4332037   | 1950809   | <i>MAD1L1</i>    | T/C    | 1.170        | 1.91E-09         | 1.062             | 0.236            |
| 9   | rs12553324  | 23347865  | <i>ELAVL2</i>    | G/C    | 1.120        | 5.87E-09         | 1.026             | 0.259            |
| 10  | rs10821745  | 62136206  | <i>ANK3</i>      | G/T    | 1.145        | 6.76E-09         | 1.048             | 0.189            |
| 10  | rs78089757  | 127112829 | intergenic       | A/G    | 1.410        | 3.99E-07         | 0.844             | 0.0842           |
| 11  | rs174576    | 61603510  | <i>FADS1/2</i>   | A/C    | 1.130        | 1.34E-10         | 1.019             | 0.614            |
| 11  | rs7122539   | 66662731  | <i>RCE1</i>      | G/A    | 1.067        | 3.77E-08         | 1.016             | 0.465            |
| 11  | rs12575685  | 70517927  | <i>SHANK2</i>    | A/G    | 1.073        | 7.71E-09         | 1.095             | <b>0.00558</b>   |
| 11  | rs12290811  | 79083620  | <i>ODZ4</i>      | A/T    | 1.190        | 7.81E-11         | 1.019             | 0.754            |
| 11  | rs329674    | 133776948 | <i>LOC646543</i> | A/G    | 1.220        | 9.59E-08         | 0.927             | 0.0377           |
| 12  | rs10744560  | 2387099   | <i>CACNA1C</i>   | T/C    | 1.076        | 3.62E-10         | 1.005             | 0.916            |
| 15  | rs4447398   | 42904904  | <i>HAUS2</i>     | A/C    | 1.099        | 9.37E-09         | 1.011             | 0.890            |
| 16  | rs11647445  | 9926966   | <i>GRIN2A</i>    | G/T    | 1.079        | 1.08E-10         | 1.028             | 0.958            |
| 17  | rs76317718  | 8222777   | <i>ARHGEF15</i>  | G/T    | 1.190        | 2.24E-07         | 1.009             | 0.803            |
| 17  | rs112114764 | 42201041  | <i>HDAC5</i>     | G/T    | 1.071        | 2.45E-08         | 1.005             | 0.867            |
| 20  | rs6130764   | 43750410  | <i>STK4</i>      | T/C    | 1.064        | 3.25E-08         | 1.029             | 0.566            |
